# Supplementary material for: Systemic Metabolomic Profiles in Adult Patients with Bacterial Sepsis: Characterization of Patient Heterogeneity at the Time of Diagnosis
Source: MDPI journal article supplement (doi:10.3390/biom13020223), 2023-01-24
Supplement: s1 [file s1]

# Systemic metabolomic profiles in adult patients with bacterial sepsis; characterization of patient heterogeneity at the time of diagnosis

Knut Anders Mosevoll, Bent Are Hansen, Ingunn Margareetta Gundersen, Håkon Reikvam, Øyvind Bruserud, Øystein Bruserud and Øystein Wendelbo

Table S1: Clinical characteristics of the patients included in our present study; a comparison of the Sepsis-3 (35 patients) patients and patients that only fulfilled the Sepsis-2 criteria (25 patients); Table S2: Classification of individual metabolites detected in our present study; Table S3: Metabolic differences of individual metabolites between patients fulfilling the Sepsis-3 definition (PMID 26903338) versus patients only fulfilling the Sepsis-2 criteria (PMID 12682500, 12664219); Table S4: Metabolic differences of individual metabolites between patients with and without bacteremia; Table S5: Differences of individual metabolites between patients Gram negative versus Gram positive infection; Table S6: Summary of individual metabolites between patients with Gram negative and Gram positive infection; Table S7: Subclassification of the 42 metabolites showing the strongest correlation with total SOFA score, i.e. a p-value <0.05 and a correlation factor >0.6 when using the Pearson test; Table S8: The correlation between the serum level of individual metabolites and the total SOFA score; a list presenting all metabolites that showed a p-value corresponding to <0.05 when using the Pearson's correlation test; Table S9: Correlation between individual the 56 steroid hormone metabolites and the maximal total SOFA score; Figure S1: Subclassification of sepsis patients based on lipid metabolites that showed a strong correlation with the total SOFA score; Methodological strategies used by Metabolon for metabolomic analyses of our present samples.

**Table S1.** Clinical characteristics of the patients included in our present study; a comparison of the Sepsis-3 (35 patients) patients and patients that only fulfilled the Sepsis-2 criteria (25 patients). Statistically significant differences are marked with grey and p-values in bold.

|                                                         | <i>Sepsis 3.0 (n=35)</i> |                        | <i>Sepsis 2.0 (n=25)</i> |                        | <i>p-value</i>    |
|---------------------------------------------------------|--------------------------|------------------------|--------------------------|------------------------|-------------------|
|                                                         | <i>Median</i>            | <i>Variation range</i> | <i>Median</i>            | <i>Variation range</i> |                   |
| <b>Age (years)<sup>a</sup></b>                          | 66                       | 23-96                  | 62                       | 20-84                  | 0.412             |
| <b>Peripheral blood examination<sup>a</sup></b>         |                          |                        |                          |                        |                   |
| Hgb (g/dL)                                              | 13                       | 8.7-16.2               | 12.8                     | 10.7-17.5              | 0.929             |
| WBC (10 <sup>9</sup> /L)                                | 12.5                     | 4.9-46.6               | 15.9                     | 8.4-32.6               | <b>0.030</b>      |
| Neutrophils (10 <sup>9</sup> /L)                        | 10.8                     | 3.4-41.1               | 13.6                     | 5.2-28.6               | 0.196             |
| CRP (mg/L)                                              | 169                      | 4-538                  | 182                      | 61-370                 | 0.313             |
| Erythrocyte sedimentation rate (ESR)                    | 36                       | 5-126                  | 47                       | 17-107                 | 0.124             |
| Creatinine (umol/L)                                     | 114                      | 51-475                 | 69                       | 27-706                 | <b>0.001</b>      |
| <b>Clinical findings at hospitalization<sup>a</sup></b> |                          |                        |                          |                        |                   |
| Temperature (°C)                                        | 38.8                     | 36.3-41.4              | 38.4                     | 36.5-41.5              | 0.305             |
| Heart rate (/min)                                       | 111                      | 74-140                 | 108                      | 70-131                 | 0.319             |
| Respiratory frequency (/min)                            | 24                       | 14-60                  | 24                       | 15-53                  | 0.906             |
| Systolic blood pressure (mmHg)                          | 121                      | 11-161                 | 131                      | 104-180                | 0.131             |
| Diastolic blood pressure (mmHg)                         | 66                       | 26-110                 | 78                       | 41-97                  | 0.410             |
| Glascow coma scale (GCS)                                | 15                       | 3-15                   | 15                       | 15-15                  | 0.062             |
| <b>Observations during hospitalization</b>              |                          |                        |                          |                        |                   |
| Lowest systolic blood pressure (mmHg)                   | 88                       | 65-124                 | 109                      | 91-134                 | <b>&lt;0.001</b>  |
| Lowest middle artery pressure (mmHg)                    | 59                       | 50-96                  | 68                       | 61-105                 | <b>0.015</b>      |
| PaO <sub>2</sub> (kPa)                                  | 8.4                      | 4.6-17.9               | 9.4                      | 5.6-15.2               | 0.198             |
| FiO <sub>2</sub>                                        | 0.21                     | 0.21-0.42              | 0.21                     | 0.21-0.21              | 0.592             |
| PaO <sub>2</sub> /FiO <sub>2</sub>                      | 38                       | 11-85                  | 45                       | 26.6-72                | 0.067             |
| Total SOFA <sub>≥2</sub> <sup>b,c</sup>                 | 35                       | 100%                   | 0                        | 0                      | <b>&lt;0.0005</b> |
| Any organ failure SOFA <sub>≥2</sub>                    | 28                       | 80%                    | 0                        | 0                      | <b>&lt;0.0005</b> |
| Respiratory failure                                     | 27                       | 77%                    | 8                        | 32%                    | <b>0.0006</b>     |
| Hypotension                                             | 24                       | 69%                    | 7                        | 28%                    | <b>0.002</b>      |
| Platelets <100 x 10 <sup>9</sup> /L                     | 13                       | 37%                    | 0                        | 0%                     | <b>0.001</b>      |
| Renal failure                                           | 17                       | 49%                    | 0                        | 0%                     | <b>&lt;0.001</b>  |
| Liver failure                                           | 9                        | 26%                    | 2                        | 8%                     | 0.08              |
| CNS failure                                             | 8                        | 23%                    | 0                        | 7%                     | <b>0.01</b>       |
| <b>Infection site<sup>b</sup></b>                       |                          |                        |                          |                        | 0.075             |
| Urinary tract                                           | 14                       | 40%                    | 14                       | 56%                    | ns                |
| Respiratory                                             | 4                        | 11%                    | 5                        | 20%                    | ns                |
| Soft tissue                                             | 8                        | 23%                    | 3                        | 12%                    | ns                |
| CNS                                                     | 3                        | 9%                     | 0                        | 0                      | ns                |
| Endocarditis                                            | 5                        | 14%                    | 0                        | 0                      | ns                |
| Other                                                   | 1                        | 2%                     | 3                        | 12%                    | ns                |

<sup>a</sup>Median (min–max). Mann–Whitney U test; ns, not significant.

<sup>b</sup>N(%).  $\chi^2$  test; ns, not significant.

<sup>c</sup>Defined as increase in sequential (sepsis-related) organ failure assessment score  $\geq 2$ , sepsis induced (pre-existing, stable organ failure not included).

**Table S2.** Classification of individual metabolites detected in our present study. The table present the main metabolic classes (capitals in bold), the various subclasses and for each subclass the number of individual metabolites (number in parenthesis).

| <b>AMINO ACIDS METABOLISM</b>                            |
|----------------------------------------------------------|
| Glycine, Serine and Threonine Metabolism (10)            |
| Alanine and Aspartate Metabolism (9)                     |
| Glutamate Metabolism (12)                                |
| Histidine Metabolism (19)                                |
| Lysine Metabolism (19)                                   |
| Phenylalanine Metabolism (7)                             |
| Tyrosine Metabolism (21)                                 |
| Tryptophan Metabolism (25)                               |
| Leucine, Isoleucine and Valine Metabolism (33)           |
| Methionine, Cysteine, SAM and Taurine Metabolism (26)    |
| Urea cycle; Arginine and Proline Metabolism (24)         |
| Creatine Metabolism (3)                                  |
| Polyamine Metabolism (9)                                 |
| Guanidino and Acetamido Metabolism (3)                   |
| Glutathione Metabolism (7)                               |
| <b>PEPTIDE</b>                                           |
| Gamma-glutamyl Amino Acid (18)                           |
| Dipeptide (11)                                           |
| Polypeptide (2)                                          |
| Fibrinogen Cleavage Peptide (14)                         |
| Acetylated Peptides (4)                                  |
| Modified Peptides (1)                                    |
| <b>CARBOHYDRATE</b>                                      |
| Glycolysis, Gluconeogenesis, and Pyruvate Metabolism (5) |
| Pentose Metabolism (8)                                   |
| Glycogen Metabolism (1)                                  |
| Disaccharides and Oligosaccharides (2)                   |
| Fructose, Mannose and Galactose Metabolism (4)           |
| Aminosugar Metabolism (5)                                |
| Aminosugar Metabolism (4)                                |
| Advanced Glycation End-product (1)                       |
| <b>ENERGY METABOLISM</b>                                 |
| TCA Cycle (9)                                            |
| Oxidative Phosphorylation (1)                            |
| <b>LIPID METABOLISM</b>                                  |
| Fatty Acid Synthesis (2)                                 |
| Short Chain Fatty Acid (2)                               |
| Medium Chain Fatty Acid (10)                             |
| Long Chain Saturated Fatty Acid (7)                      |
| Long Chain Monounsaturated Fatty Acid (7)                |
| Long Chain Polyunsaturated Fatty Acid (n3 and n6) (19)   |

|                                                                  |
|------------------------------------------------------------------|
| Fatty Acid, Branched (7)                                         |
| Fatty Acid, Dicarboxylate (33)                                   |
| Fatty Acid, Amino (3)                                            |
| Fatty Acid Metabolism (also BCAA Metabolism) (4)                 |
| Fatty Acid Metabolism (Acyl Glutamine) (2)                       |
| Fatty Acid Metabolism (Acyl Glycine) (8)                         |
| Fatty Acid Metabolism (Acyl Carnitine, Short Chain) (1)          |
| Fatty Acid Metabolism (Acyl Carnitine, Medium Chain) (7)         |
| Fatty Acid Metabolism (Acyl Carnitine, Long Chain Saturated) (7) |
| Fatty Acid Metabolism (Acyl Carnitine, Monounsaturated) (10)     |
| Fatty Acid Metabolism (Acyl Carnitine, Polyunsaturated) (6)      |
| Fatty Acid Metabolism (Acyl Carnitine, Dicarboxylate) (5)        |
| Fatty Acid Metabolism (Acyl Carnitine, Hydroxy) (5)              |
| Carnitine Metabolism (2)                                         |
| Ketone Bodies (2)                                                |
| Fatty Acid Metabolism (Acyl Choline) (9)                         |
| Fatty Acid, Monohydroxy (23)                                     |
| Fatty Acid, Dihydroxy (5)                                        |
| Docosanoid (1)                                                   |
| Eicosanoid (5)                                                   |
| Endocannabinoid (10)                                             |
| Inositol Metabolism (2)                                          |
| Phospholipid Metabolism (8)                                      |
| Phosphatidylserine (PS) (2)                                      |
| Lysophospholipid (7)                                             |
| Glycerolipid Metabolism (2)                                      |
| Sphingolipid Synthesis (3)                                       |
| Ceramide Pes (1)                                                 |
| Sphingosines (2)                                                 |
| Mevalonate Metabolism (1)                                        |
| Sterol (7)                                                       |
| Pregnenolone Steroids (9)                                        |
| Progestin Steroids (7)                                           |
| Corticosteroids (8)                                              |
| Androgenic Steroids (25)                                         |
| Estrogenic Steroids (1)                                          |
| Primary Bile Acid Metabolism (14)                                |
| Secondary Bile Acid Metabolism (32)                              |
| <b>NUCLEOTIDE METABOLISM</b>                                     |
| Purine Metabolism, (Hypo)Xanthine/Inosine containing (7)         |
| Purine Metabolism, Adenine containing (13)                       |
| Pyrimidine Metabolism, Orotate containing (4)                    |
| Pyrimidine Metabolism, Uracil containing (12)                    |
| Pyrimidine Metabolism, Cytidine containing (7)                   |
| Purine and Pyrimidine Metabolism (1)                             |

| <b>COFACTORS AND VITAMINS</b>                  |
|------------------------------------------------|
| Nicotinate and Nicotinamide Metabolism (6)     |
| Pantothenate and CoA Metabolism (2)            |
| Ascorbate and Aldarate Metabolism (6)          |
| Tocopherol Metabolism (9)                      |
| Hemoglobin and Porphyrin Metabolism (6)        |
| Vitamin A Metabolism (6)                       |
| Vitamin B6 Metabolism (1)                      |
| <b>XENOBIOTICS</b>                             |
| Benzoate Metabolism (34)                       |
| Xanthine Metabolism (14)                       |
| Tobacco Metabolite (6)                         |
| Food Component/Plant (74)                      |
| Bacterial/Fungal                               |
| Bacterial/Fungal                               |
| Drug - Analgesics, Anesthetics (29)            |
| Drug - Antibiotic (16)                         |
| Drug - Antiviral (1)                           |
| Drug - Antiinflammatory, Immunosuppressant (1) |
| Drug - Antineoplastic (1)                      |
| Drug - Cardiovascular (13)                     |
| Drug - Gastrointestinal (6)                    |
| Drug - Metabolic (4)                           |
| Drug - Neurological (15)                       |
| Drug - Psychoactive (13)                       |
| Drug - Respiratory (3)                         |
| Drug - Topical Agents (4)                      |
| Drug - Other (2)                               |
| Chemical (36)                                  |
| <b>PARTIALLY CHARACTERIZED MOLECULES (29)</b>  |

**Table S3.** Metabolic differences of individual metabolites between patients fulfilling the Sepsis-3 definition (PMID 26903338) versus patients only fulfilling the Sepsis-2 criteria (PMID 12682500, 12664219). All individual metabolites showing a significant difference in ANOVA analysis are listed in the figure. The metabolites are listed according to their classification. The table presents from left to right significant correlation with the SOFA score (significance indicated by blue), significantly differing metabolites from the comparisons of Gram-positive versus Gram-negative infections (G+/-) and without/with bacteremia indicated by color and ratio of mean levels, ratio of mean levels (Sepsis-3 level relative to Sepsis-2 level) with corresponding p- and q-values, and the classification/identity of the identified individual metabolite. A ratio >1.00 is indicated by red (i.e. higher in patients with Gram-negative infection, patients with bacteremia or patients fulfilling the Sepsis-3 criteria) whereas a ratio <1.00 is indicated by green (\* The metabolite identity not confirmed based on a standard).

| SOFA                            | G-/+ | Without or with bacteremia | SEPSIS-3 versus Sepsis-2 | p-value | q-value | SUBPATHWAY                                | IDENTITY                         |
|---------------------------------|------|----------------------------|--------------------------|---------|---------|-------------------------------------------|----------------------------------|
| <b>AMINO ACIDS AND PEPTIDES</b> |      |                            |                          |         |         |                                           |                                  |
|                                 | 0,72 | 0,70                       | 1,18                     | 0,0406  | 0,3702  | Alanine and Aspartate Metabolism          | N-acetylalanine                  |
|                                 | 1,07 | 1,18                       | 1,79                     | 0,0016  | 0,1304  | Alanine and Aspartate Metabolism          | N-carbamoylalanine               |
|                                 | 1,07 | 1,56                       | 1,90                     | 0,0130  | 0,2556  | Glutamate Metabolism                      | carboxyethyl-GABA                |
|                                 | 0,86 | 0,79                       | 1,36                     | 0,0284  | 0,3266  | Histidine Metabolism                      | 1-methylhistidine                |
|                                 | 0,92 | 1,13                       | 1,87                     | 0,0135  | 0,2574  | Histidine Metabolism                      | N-acetyl-1-methylhistidine*      |
|                                 | 0,79 | 1,03                       | 1,85                     | 0,0492  | 0,4051  | Histidine Metabolism                      | imidazole lactate                |
|                                 | 0,64 | 0,70                       | 1,32                     | 0,0418  | 0,3750  | Histidine Metabolism                      | 1-methyl-4-imidazoleacetate      |
|                                 | 0,39 | 0,36                       | 0,57                     | 0,0290  | 0,3266  | Histidine Metabolism                      | 1-methyl-5-imidazoleacetate      |
|                                 | 0,39 | 0,36                       | 0,65                     | 0,0392  | 0,3702  | Histidine Metabolism                      | 1-methyl-5-imidazolelactate      |
|                                 | 0,60 | 0,70                       | 1,22                     | 0,0241  | 0,3221  | Lysine Metabolism                         | 5-(galactosylhydroxy)-lysine     |
|                                 | 1,07 | 0,87                       | 2,33                     | 0,0180  | 0,2849  | Tyrosine Metabolism                       | N-acetyltyrosine                 |
|                                 | 1,02 | 1,07                       | 2,22                     | 0,0073  | 0,2422  | Tyrosine Metabolism                       | 3-(4-hydroxyphenyl)lactate       |
|                                 | 2,75 | 2,63                       | 3,55                     | 0,0059  | 0,2338  | Tyrosine Metabolism                       | phenol sulfate                   |
|                                 | 0,98 | 1,02                       | 1,56                     | 0,0378  | 0,3702  | Tyrosine Metabolism                       | N-formylphenylalanine            |
|                                 | 0,90 | 0,86                       | 1,92                     | 0,0113  | 0,2556  | Tryptophan Metabolism                     | kynurenine                       |
|                                 | 1,30 | 1,05                       | 1,61                     | 0,0257  | 0,3249  | Tryptophan Metabolism                     | indolelactate                    |
|                                 | 0,82 | 0,73                       | 1,54                     | 0,0240  | 0,3221  | Leucine, Isoleucine and Valine Metabolism | beta-hydroxyisovaleroylcarnitine |
|                                 | 0,66 | 0,72                       | 1,24                     | 0,0277  | 0,3249  | Leucine, Isoleucine and Valine Metabolism | 3-methylglutaconate              |
|                                 | 0,78 | 0,93                       | 0,78                     | 0,0369  | 0,3702  | Leucine, Isoleucine and Valine Metabolism | isoleucine                       |

|              |      |      |      |        |        |                                                      |                                                  |
|--------------|------|------|------|--------|--------|------------------------------------------------------|--------------------------------------------------|
|              | 0,85 | 0,68 | 1,75 | 0,0116 | 0,2556 | Leucine, Isoleucine and Valine Metabolism            | tiglylcarnitine (C5:1-DC)                        |
|              | 0,90 | 0,93 | 1,37 | 0,0383 | 0,3702 | Leucine, Isoleucine and Valine Metabolism            | 3-hydroxy-2-ethylpropionate                      |
|              | 0,80 | 0,75 | 1,10 | 0,0100 | 0,2556 | Leucine, Isoleucine and Valine Metabolism            | N-carbamoylvaline                                |
|              | 0,31 | 0,42 | 0,29 | 0,0162 | 0,2703 | Methionine, Cysteine, SAM and Taurine Metabolism     | N-acetylmethionine sulfoxide                     |
|              | 0,63 | 0,60 | 1,23 | 0,0405 | 0,3702 | Methionine, Cysteine, SAM and Taurine Metabolism     | 2,3-dihydroxy-5-methylthio-4-pentenoate (DMTPA)* |
|              | 0,81 | 0,74 | 1,70 | 0,0393 | 0,3702 | Methionine, Cysteine, SAM and Taurine Metabolism     | cysteine                                         |
|              | 0,94 | 0,88 | 0,83 | 0,0150 | 0,2660 | Urea cycle; Arginine and Proline Metabolism          | arginine                                         |
|              | 1,03 | 1,01 | 1,96 | 0,0010 | 0,1276 | Urea cycle; Arginine and Proline Metabolism          | urea                                             |
|              | 1,13 | 1,00 | 1,74 | 0,0256 | 0,3249 | Urea cycle; Arginine and Proline Metabolism          | homocitrulline                                   |
|              | 0,47 | 0,76 | 1,16 | 0,0120 | 0,2556 | Urea cycle; Arginine and Proline Metabolism          | N2,N5-diacetylornithine                          |
|              | 0,77 | 1,08 | 3,56 | 0,0020 | 0,1304 | Urea cycle; Arginine and Proline Metabolism          | argininate*                                      |
|              | 0,70 | 0,83 | 1,71 | 0,0485 | 0,4033 | Polyamine Metabolism                                 | (N(1) + N(8))-acetylspermidine                   |
|              | 0,90 | 0,64 | 1,57 | 0,0275 | 0,3249 | Polyamine Metabolism                                 | acisoga                                          |
|              | 1,85 | 1,86 | 4,54 | 0,0246 | 0,3221 | Polyamine Metabolism                                 | N1,N12-diacetylspermine                          |
|              | 0,58 | 0,76 | 1,71 | 0,0372 | 0,3702 | Polyamine Metabolism                                 | 4-acetamidobutanoate                             |
|              | 0,95 | 1,43 | 2,21 | 0,0015 | 0,1304 | Guanidino and Acetamido Metabolism                   | guanidinosuccinate                               |
|              | 0,91 | 0,81 | 0,80 | 0,0349 | 0,3574 | Gamma-glutamyl Amino Acid                            | gamma-glutamylserine                             |
|              | 0,73 | 0,77 | 0,65 | 0,0231 | 0,3221 | Dipeptide                                            | isoleucylglycine                                 |
|              | 0,89 | 0,59 | 0,59 | 0,0268 | 0,3249 | Fibrinogen Cleavage Peptide                          | fibrinopeptide A (3-15)**                        |
|              | 0,91 | 0,70 | 0,76 | 0,0147 | 0,2660 | Fibrinogen Cleavage Peptide                          | fibrinopeptide B (1-11)**                        |
|              | 0,72 | 0,75 | 0,80 | 0,0089 | 0,2556 | Fibrinogen Cleavage Peptide                          | fibrinopeptide B (1-12)**                        |
| CARBOHYDRATE |      |      |      |        |        |                                                      |                                                  |
|              | 1,06 | 1,14 | 1,35 | 0,0323 | 0,3485 | Glycolysis, Gluconeogenesis, and Pyruvate Metabolism | lactate                                          |
|              | 1,11 | 1,10 | 1,32 | 0,0129 | 0,2556 | Pentose Metabolism                                   | ribonate                                         |
|              | 0,88 | 0,78 | 1,36 | 0,0232 | 0,3221 | Pentose Metabolism                                   | arabinose                                        |
|              | 0,74 | 0,72 | 1,45 | 0,0206 | 0,3069 | Pentose Metabolism                                   | arabitol/xylitol                                 |
|              | 2,27 | 2,08 | 3,71 | 0,0059 | 0,2338 | Fructose, Mannose and Galactose Metabolism           | galactonate                                      |
|              | 0,60 | 0,65 | 1,12 | 0,0346 | 0,3574 | Aminosugar Metabolism                                | erythronate*                                     |
|              | 1,02 | 0,88 | 1,32 | 0,0484 | 0,4033 | Aminosugar Metabolism                                | N-acetylglucosamine/N-acetylgalactosamine        |

| ENERGY METABOLISM      |      |      |      |        |        |                                                      |                                     |
|------------------------|------|------|------|--------|--------|------------------------------------------------------|-------------------------------------|
|                        | 0,88 | 1,12 | 1,68 | 0,0168 | 0,2741 | TCA Cycle                                            | alpha-ketoglutarate                 |
|                        | 0,97 | 1,00 | 1,77 | 0,0224 | 0,3221 | TCA Cycle                                            | fumarate                            |
| LIPIDS                 |      |      |      |        |        |                                                      |                                     |
|                        | 1,48 | 1,56 | 2,13 | 0,0153 | 0,2660 | Fatty Acid, Amino                                    | N-acetyl-2-aminooctanoate*          |
|                        | 0,90 | 0,85 | 0,65 | 0,0109 | 0,2556 | Fatty Acid Metabolism (Acyl Choline)                 | palmitoylcholine                    |
|                        | 0,82 | 1,28 | 0,62 | 0,0089 | 0,2556 | Fatty Acid Metabolism (Acyl Choline)                 | dihomo-linolenoyl-choline           |
|                        | 0,95 | 0,91 | 0,67 | 0,0130 | 0,2556 | Fatty Acid Metabolism (Acyl Choline)                 | linoleoylcholine*                   |
|                        | 0,92 | 0,91 | 0,65 | 0,0107 | 0,2556 | Fatty Acid Metabolism (Acyl Choline)                 | stearoylcholine*                    |
|                        | 0,86 | 1,03 | 0,60 | 0,0071 | 0,2422 | Fatty Acid Metabolism (Acyl Choline)                 | arachidonoylcholine                 |
|                        | 0,59 | 1,38 | 0,45 | 0,0467 | 0,4011 | Eicosanoid                                           | 12-HETE                             |
|                        | 0,84 | 1,06 | 0,73 | 0,0244 | 0,3221 | Endocannabinoid                                      | N-stearoylserine*                   |
|                        | 0,62 | 0,69 | 1,15 | 0,0408 | 0,3702 | Mevalonate Metabolism                                | 3-hydroxy-3-methylglutarate         |
|                        | 0,39 | 1,25 | 1,58 | 0,0328 | 0,3489 | Primary Bile Acid Metabolism                         | glycocholate                        |
| NUCLEOTIDE             |      |      |      |        |        |                                                      |                                     |
|                        | 1,04 | 1,04 | 1,48 | 0,0003 | 0,1276 | Purine Metabolism, (Hypo)Xanthine/Inosine containing | urate                               |
|                        | 1,70 | 1,74 | 2,33 | 0,0020 | 0,1304 | Purine Metabolism, (Hypo)Xanthine/Inosine containing | allantoin                           |
|                        | 0,47 | 0,80 | 1,49 | 0,0457 | 0,3968 | Purine Metabolism, Adenine containing                | N6-succinyladenosine                |
|                        | 2,79 | 6,70 | 4,58 | 0,0044 | 0,2066 | Pyrimidine Metabolism, Orotate containing            | orotidine                           |
|                        | 0,84 | 1,15 | 1,90 | 0,0289 | 0,3266 | Pyrimidine Metabolism, Uracil containing             | uracil                              |
|                        | 0,53 | 0,63 | 1,10 | 0,0481 | 0,4033 | Pyrimidine Metabolism, Uracil containing             | 3-(3-amino-3-carboxypropyl)uridine* |
|                        | 1,18 | 1,14 | 1,87 | 0,0062 | 0,2358 | Pyrimidine Metabolism, Thymine containing            | 5,6-dihydrothymine                  |
| COFACTORS AND VITAMINS |      |      |      |        |        |                                                      |                                     |
|                        | 0,83 | 1,18 | 2,20 | 0,0040 | 0,2054 | Nicotinate and Nicotinamide Metabolism               | N1-methyl-2-pyridone-5-carboxamide  |
|                        | 0,90 | 1,02 | 2,03 | 0,0206 | 0,3069 | Nicotinate and Nicotinamide Metabolism               | N1-methyl-4-pyridone-3-carboxamide  |
|                        | 0,53 | 1,56 | 2,20 | 0,0160 | 0,2703 | Pantothenate and CoA Metabolism                      | pantoate                            |
|                        | 0,99 | 0,92 | 1,29 | 0,0182 | 0,2849 | Ascorbate and Aldarate Metabolism                    | ascorbic acid 3-sulfate*            |
|                        | 0,72 | 0,71 | 1,21 | 0,0339 | 0,3564 | Ascorbate and Aldarate Metabolism                    | 2-O-methylascorbic acid             |

|                         |       |      |       |        |        |                                   |                                                 |
|-------------------------|-------|------|-------|--------|--------|-----------------------------------|-------------------------------------------------|
|                         | 0,55  | 0,78 | 1,32  | 0,0115 | 0,2556 | Vitamin B6 Metabolism             | pyridoxate                                      |
| XENOBIOTICS             |       |      |       |        |        |                                   |                                                 |
|                         | 2,17  | 2,56 | 3,78  | 0,0208 | 0,3069 | Food Component/Plant              | 2,8-quinolinediol sulfate                       |
|                         | 1,39  | 1,10 | 1,46  | 0,0068 | 0,2422 | Food Component/Plant              | 3-formylindole                                  |
|                         | 0,79  | 0,84 | 1,48  | 0,0090 | 0,2556 | Food Component/Plant              | erythritol                                      |
|                         | 1,11  | 0,86 | 2,38  | 0,0041 | 0,2054 | Food Component/Plant              | 2-keto-3-deoxy-gluconate                        |
|                         | 0,98  | 1,24 | 0,46  | 0,0299 | 0,3312 | Food Component/Plant              | tartronate (hydroxymalonate)                    |
|                         | 3,95  | 3,89 | 5,34  | 0,0021 | 0,1304 | Food Component/Plant              | vanillic acid glycine                           |
|                         | 11,97 | 0,28 | 0,08  | 0,0153 | 0,2660 | Drug - Antibiotic                 | trimethoprim                                    |
|                         | 5,35  | 5,08 | 3,10  | 0,0056 | 0,2338 | Drug - Cardiovascular             | metoprolol                                      |
|                         | 2,70  | 2,48 | 2,36  | 0,0024 | 0,1350 | Drug - Cardiovascular             | metoprolol acid metabolite*                     |
|                         | 3,24  | 3,11 | 3,26  | 0,0000 | 0,0057 | Drug - Cardiovascular             | alpha-hydroxymetoprolol                         |
|                         | 1,12  | 1,13 | 1,10  | 0,0112 | 0,2556 | Drug - Cardiovascular             | warfarin                                        |
|                         | 1,60  | 1,72 | 1,55  | 0,0011 | 0,1276 | Drug - Cardiovascular             | 6-hydroxywarfarin                               |
|                         | 3,65  | 5,52 | 5,10  | 0,0007 | 0,1276 | Drug - Cardiovascular             | 7-hydroxywarfarin                               |
|                         | 2,38  | 2,53 | 2,09  | 0,0011 | 0,1276 | Drug - Cardiovascular             | 10-hydroxywarfarin                              |
|                         | 13,19 | 2,42 | 37,65 | 0,0018 | 0,1304 | Drug - Gastrointestinal           | pantoprazole                                    |
|                         | 1,08  | 2,35 | 2,77  | 0,0273 | 0,3249 | Drug - Topical Agents             | 2,6-dihydroxybenzoic acid                       |
|                         | 0,71  | 0,76 | 1,07  | 0,0131 | 0,2556 | Drug - Topical Agents             | hydroquinone sulfate                            |
|                         | 1,16  | 1,20 | 1,70  | 0,0010 | 0,1276 | Chemical                          | sulfate*                                        |
|                         | 1,41  | 1,16 | 1,86  | 0,0432 | 0,3837 | Chemical                          | dimethyl sulfone                                |
|                         | 1,31  | 1,57 | 1,95  | 0,0449 | 0,3940 | Chemical                          | triethanolamine                                 |
|                         | 0,61  | 0,55 | 1,93  | 0,0304 | 0,3328 | Chemical                          | (2-butoxyethoxy)acetic acid                     |
| PARTIALLY CHARACTERIZED |       |      |       |        |        |                                   |                                                 |
|                         | 0,67  | 0,77 | 1,13  | 0,0397 | 0,3702 | Partially Characterized Molecules | glycine conjugate of C10H12O2*                  |
|                         | 1,40  | 1,60 | 2,18  | 0,0121 | 0,2556 | Partially Characterized Molecules | bilirubin degradation product, C16H18N2O5 (1)** |
|                         | 1,40  | 1,61 | 2,27  | 0,0080 | 0,2556 | Partially Characterized Molecules | bilirubin degradation product, C16H18N2O5 (3)** |
|                         | 1,42  | 1,61 | 2,10  | 0,0268 | 0,3249 | Partially Characterized Molecules | bilirubin degradation product, C16H18N2O5 (4)** |

**Table S4.** Metabolic differences of individual metabolites between patients with and without bacteremia. All individual metabolites showing a significant difference in ANOVA analysis are listed in the figure. The metabolites are listed according to their classification. The table presents from left to right significant correlation with the SOFA score (significance indicated by blue), significantly differing metabolites from the comparisons of Gram negative versus Gram positive infections (G+/-) and without/with bacteremia indicated by color and ratio of mean levels, ratio of mean levels (Sepsis-3 level relative to Sepsis-2 level) with corresponding p- and q-values for the bacteremia comparison, and the classification/identity of the identified individual metabolite. A ratio >1.00 is indicated by red (i.e. higher in patients with bacteremia) whereas a ratio <1.00 is indicated by green (\* The metabolite identity not confirmed based on a standard).

| SOFA                            | G-/+ | Without or with bacteremia | SEPSIS-3 versus Sepsis-2 | p-value | q-value | SUBPATHWAY                                              | IDENTITY                                     |
|---------------------------------|------|----------------------------|--------------------------|---------|---------|---------------------------------------------------------|----------------------------------------------|
| <b>AMINO ACIDS AND PEPTIDES</b> |      |                            |                          |         |         |                                                         |                                              |
|                                 | 0,40 | 0,36                       | 0,95                     | 0,0209  | 0,6705  | Lysine Metabolism                                       | N,N-dimethyl-5-aminovalerate                 |
|                                 | 0,55 | 0,47                       | 2,56                     | 0,0492  | 0,6705  | Tryptophan Metabolism                                   | Picolinate                                   |
|                                 | 1,72 | 1,66                       | 1,23                     | 0,0177  | 0,6705  | Tryptophan Metabolism                                   | 6-bromotryptophan                            |
|                                 | 0,17 | 0,11                       | 0,21                     | 0,0234  | 0,6705  | Methionine, Cysteine, SAM and Taurine Metabolism        | Cystathionine                                |
|                                 | 0,91 | 0,62                       | 1,17                     | 0,0466  | 0,6705  | Methionine, Cysteine, SAM and Taurine Metabolism        | alpha-ketobutyrate                           |
|                                 | 0,54 | 0,45                       | 0,89                     | 0,0179  | 0,6705  | Urea cycle; Arginine and Proline Metabolism             | N,N,N-trimethyl-alanylproline betaine (TMAP) |
|                                 | 0,58 | 0,55                       | 0,89                     | 0,0217  | 0,6705  | Gamma-glutamyl Amino Acid                               | gamma-glutamylphenylalanine                  |
|                                 | 0,68 | 0,47                       | 0,91                     | 0,0108  | 0,6115  | Gamma-glutamyl Amino Acid                               | gamma-glutamyl-2-aminobutyrate               |
|                                 | 0,91 | 0,70                       | 0,76                     | 0,0124  | 0,6115  | Fibrinogen Cleavage Peptide                             | fibrinopeptide B (1-11)**                    |
|                                 | 0,72 | 0,75                       | 0,80                     | 0,0034  | 0,4029  | Fibrinogen Cleavage Peptide                             | fibrinopeptide B (1-12)**                    |
|                                 | 0,50 | 0,47                       | 0,85                     | 0,0381  | 0,6705  | Modified Peptides                                       | N,N-dimethyl-pro-pro                         |
| <b>ENERGY</b>                   |      |                            |                          |         |         |                                                         |                                              |
|                                 | 0,74 | 0,63                       | 0,94                     | 0,0172  | 0,6705  | TCA Cycle                                               | 2-methylcitrate/homocitrate                  |
| <b>LIPIDS</b>                   |      |                            |                          |         |         |                                                         |                                              |
|                                 | 0,15 | 0,08                       | 0,23                     | 0,0122  | 0,6115  | Fatty Acid Synthesis                                    | Malonylcarnitine                             |
|                                 | 1,24 | 1,34                       | 1,02                     | 0,0459  | 0,6705  | Short Chain Fatty Acid                                  | butyrate/isobutyrate (4:0)                   |
|                                 | 0,39 | 0,43                       | 1,13                     | 0,0490  | 0,6705  | Fatty Acid, Dicarboxylate                               | decadienedioic acid (C10:2-DC)**             |
|                                 | 1,59 | 1,54                       | 1,23                     | 0,0497  | 0,6705  | Fatty Acid Metabolism (Acyl Carnitine, Monounsaturated) | ximenoylcarnitine (C26:1)*                   |
|                                 | 0,63 | 0,55                       | 1,04                     | 0,0452  | 0,6705  | Fatty Acid Metabolism (Acyl Carnitine, Dicarboxylate)   | octadecanedioylcarnitine (C18-DC)*           |
|                                 | 0,51 | 0,43                       | 0,96                     | 0,0227  | 0,6705  | Fatty Acid Metabolism (Acyl Carnitine, Dicarboxylate)   | octadecenedioylcarnitine (C18:1-DC)*         |

|                        |      |      |      |        |        |                                                      |                                             |
|------------------------|------|------|------|--------|--------|------------------------------------------------------|---------------------------------------------|
|                        | 0,71 | 0,62 | 1,09 | 0,0252 | 0,6705 | Fatty Acid Metabolism (Acyl Carnitine, Hydroxy)      | 3-hydroxyoleoylcarnitine                    |
|                        | 1,78 | 2,45 | 1,68 | 0,0004 | 0,0870 | Fatty Acid, Monohydroxy                              | 2-hydroxydecanoate                          |
|                        | 0,78 | 0,52 | 1,03 | 0,0263 | 0,6705 | Fatty Acid, Monohydroxy                              | 3-hydroxyhexanoate                          |
|                        | 1,31 | 1,94 | 1,27 | 0,0196 | 0,6705 | Eicosanoid                                           | leukotriene B4                              |
|                        | 0,64 | 0,40 | 1,24 | 0,0342 | 0,6705 | Progestin Steroids                                   | 5alpha-pregnan-3beta,20alpha-diol disulfate |
|                        | 0,53 | 0,42 | 0,89 | 0,0322 | 0,6705 | Progestin Steroids                                   | pregnanediol-3-glucuronide                  |
|                        | 0,94 | 0,19 | 1,33 | 0,0093 | 0,6115 | Corticosteroids                                      | cortisol 21-sulfate                         |
|                        | 0,51 | 0,87 | 1,92 | 0,0340 | 0,6705 | Primary Bile Acid Metabolism                         | Taurocholate                                |
|                        | 0,75 | 0,62 | 1,20 | 0,0470 | 0,6705 | Secondary Bile Acid Metabolism                       | tauroolithocholate 3-sulfate                |
|                        | 0,24 | 2,11 | 4,22 | 0,0476 | 0,6705 | Secondary Bile Acid Metabolism                       | taurochenodeoxycholic acid 3-sulfate        |
| NUCLEOTIDES            |      |      |      |        |        |                                                      |                                             |
|                        | 0,80 | 1,62 | 0,81 | 0,0263 | 0,6705 | Purine Metabolism, (Hypo)Xanthine/Inosine containing | Xanthine                                    |
|                        | 1,26 | 1,46 | 1,22 | 0,0251 | 0,6705 | Pyrimidine Metabolism, Uracil containing             | 5-methyluridine (ribothymidine)             |
|                        | 0,25 | 0,21 | 0,33 | 0,0121 | 0,6115 | Pyrimidine Metabolism, Thymine containing            | 3-aminoisobutyrate                          |
| COFACTORS AND VITAMINS |      |      |      |        |        |                                                      |                                             |
|                        | 1,93 | 2,50 | 1,60 | 0,0431 | 0,6705 | Vitamin A Metabolism                                 | retinol (vitamin A)                         |
| XENOBIOTICS            |      |      |      |        |        |                                                      |                                             |
|                        | 1,17 | 0,63 | 0,77 | 0,0339 | 0,6705 | Food Component/Plant                                 | methyl glucopyranoside (alpha + beta)       |
|                        | 3,95 | 3,89 | 5,34 | 0,0102 | 0,6115 | Food Component/Plant                                 | vanillic acid glycine                       |
|                        | 0,75 | 0,33 | 0,72 | 0,0217 | 0,6705 | Food Component/Plant                                 | 4-vinylguaiacol glucuronide                 |
|                        | 0,28 | 0,25 | 0,55 | 0,0119 | 0,6115 | Drug - Analgesics, Anesthetics                       | 3-(N-acetyl-cystein-S-yl) acetaminophen     |
|                        | 0,39 | 0,36 | 0,46 | 0,0446 | 0,6705 | Drug - Analgesics, Anesthetics                       | 4-acetamidophenylglucuronide                |
|                        | 0,43 | 0,48 | 0,57 | 0,0438 | 0,6705 | Drug - Analgesics, Anesthetics                       | 2-hydroxyacetaminophen sulfate*             |
|                        | 0,33 | 0,36 | 0,40 | 0,0323 | 0,6705 | Drug - Analgesics, Anesthetics                       | 2-methoxyacetaminophen sulfate*             |
|                        | 0,36 | 0,33 | 0,45 | 0,0460 | 0,6705 | Drug - Analgesics, Anesthetics                       | 2-methoxyacetaminophen glucuronide*         |
|                        | 0,26 | 0,23 | 0,46 | 0,0194 | 0,6705 | Drug - Analgesics, Anesthetics                       | 3-(cystein-S-yl)acetaminophen*              |
|                        | 0,62 | 0,45 | 0,49 | 0,0292 | 0,6705 | Drug - Analgesics, Anesthetics                       | 3-(methylthio)acetaminophen sulfate*        |
|                        | 5,35 | 5,08 | 3,10 | 0,0045 | 0,4714 | Drug - Cardiovascular                                | Metoprolol                                  |
|                        | 2,70 | 2,48 | 2,36 | 0,0081 | 0,6115 | Drug - Cardiovascular                                | metoprolol acid metabolite*                 |

|  |       |      |       |        |        |                         |                           |
|--|-------|------|-------|--------|--------|-------------------------|---------------------------|
|  | 3,24  | 3,11 | 3,26  | 0,0000 | 0,0407 | Drug - Cardiovascular   | alpha-hydroxymetoprolol   |
|  | 1,12  | 1,13 | 1,10  | 0,0019 | 0,2707 | Drug - Cardiovascular   | Warfarin                  |
|  | 1,60  | 1,72 | 1,55  | 0,0002 | 0,0690 | Drug - Cardiovascular   | 6-hydroxywarfarin         |
|  | 3,65  | 5,52 | 5,10  | 0,0006 | 0,0954 | Drug - Cardiovascular   | 7-hydroxywarfarin         |
|  | 2,38  | 2,53 | 2,09  | 0,0003 | 0,0802 | Drug - Cardiovascular   | 10-hydroxywarfarin        |
|  | 13,19 | 2,42 | 37,65 | 0,0446 | 0,6705 | Drug - Gastrointestinal | Pantoprazole              |
|  | 0,60  | 0,63 | 0,88  | 0,0101 | 0,6115 | Chemical                | 2-acrylamidoglycolic acid |

**Table S5.** Differences of individual metabolites between patients with Gram-negative versus Gram-positive infection. All individual metabolites showing a significant difference in ANOVA analysis are listed in the figure. The metabolites are listed according to their classification. The table presents from left to right significant correlation with the SOFA score (significance indicated by blue), significantly differing metabolites from the comparisons of Gram-positive versus Gram-negative infections (G+/-) and patients without/with bacteremia indicated by color and ratio of mean levels, ratio of mean levels (corresponding p- and q-values for the G-/+ comparison, and the classification/identity of the identified individual metabolite. A ratio >1.00 is indicated by red (i.e. higher in patients with bacteremia) whereas a ratio <1.00 is indicated by green (\* The metabolite identity not confirmed based on a standard).

| SOFA                            | G-/+ | Withour or with bacteremia | Sepsis-3 versus Sepsis-2 | p-value | q-value | SUBPATHWAY                                           | IDENTITY                     |
|---------------------------------|------|----------------------------|--------------------------|---------|---------|------------------------------------------------------|------------------------------|
| <b>AMINO ACIDS AND PEPTIDES</b> |      |                            |                          |         |         |                                                      |                              |
| Blue                            | 1,27 | 1,21                       | 1,09                     | 0,0412  | 0,9840  | Tryptophan Metabolism                                | tryptophan                   |
|                                 | 1,72 | 1,66                       | 1,23                     | 0,0015  | 0,2685  | Tryptophan Metabolism                                | 6-bromotryptophan            |
|                                 | 0,71 | 0,74                       | 0,96                     | 0,0420  | 0,9840  | Leucine, Isoleucine and Valine Metabolism            | N-acetyl isoleucine          |
|                                 | 0,31 | 0,42                       | 0,29                     | 0,0265  | 0,9840  | Methionine, Cysteine, SAM and Taurine Metabolism     | N-acetylmethionine sulfoxide |
| Blue                            | 1,37 | 1,04                       | 0,92                     | 0,0360  | 0,9840  | Fibrinogen Cleavage Peptide                          | fibrinopeptide A (5-16)*     |
|                                 | 1,77 | 1,23                       | 0,94                     | 0,0089  | 0,7439  | Fibrinogen Cleavage Peptide                          | fibrinopeptide A (7-16)*     |
|                                 | 2,17 | 1,19                       | 0,79                     | 0,0221  | 0,9840  | Fibrinogen Cleavage Peptide                          | fibrinopeptide A (8-16)**    |
|                                 | 0,72 | 0,75                       | 0,80                     | 0,0097  | 0,7442  | Fibrinogen Cleavage Peptide                          | fibrinopeptide B (1-12)**    |
| <b>CARBOHYDRATE</b>             |      |                            |                          |         |         |                                                      |                              |
|                                 | 1,30 | 1,20                       | 1,28                     | 0,0193  | 0,9840  | Glycolysis, Gluconeogenesis, and Pyruvate Metabolism | glucose                      |
| Blue                            | 0,05 | 0,58                       | 0,71                     | 0,0253  | 0,9840  | Disaccharides and Oligosaccharides                   | sucrose                      |
|                                 | 0,12 | 0,40                       | 0,74                     | 0,0472  | 0,9840  | Fructose, Mannose and Galactose Metabolism           | mannitol/sorbitol            |
| Blue                            | 2,27 | 2,08                       | 3,71                     | 0,0138  | 0,8220  | Fructose, Mannose and Galactose Metabolism           | galactonate                  |
| <b>LIPIDS</b>                   |      |                            |                          |         |         |                                                      |                              |
| Blue                            | 1,24 | 1,34                       | 1,02                     | 0,0280  | 0,9840  | Short Chain Fatty Acid                               | butyrate/isobutyrate (4:0)   |
|                                 | 0,36 | 0,84                       | 0,60                     | 0,0138  | 0,8220  | Long Chain Polyunsaturated Fatty Acid (n3 and n6)    | mead acid (20:3n9)           |
| Blue                            | 0,30 | 0,39                       | 0,69                     | 0,0342  | 0,9840  | Fatty Acid, Dicarboxylate                            | adipate (C6-DC)              |
|                                 | 2,22 | 1,18                       | 1,13                     | 0,0233  | 0,9840  | Fatty Acid, Dicarboxylate                            | hydroxy-CMPF*                |
| Blue                            | 0,55 | 0,53                       | 1,01                     | 0,0486  | 0,9840  | Fatty Acid Metabolism (also BCAA Metabolism)         | propionylglycine             |
|                                 | 0,47 | 0,68                       | 0,95                     | 0,0087  | 0,7439  | Fatty Acid Metabolism (Acyl Carnitine,               | 3-decenoylcarnitine          |

|             |       |      |       |        |        |                                                         |                                           |
|-------------|-------|------|-------|--------|--------|---------------------------------------------------------|-------------------------------------------|
|             |       |      |       |        |        | Monounsaturated)                                        |                                           |
|             | 1,75  | 1,11 | 0,98  | 0,0345 | 0,9840 | Fatty Acid Metabolism (Acyl Carnitine, Polyunsaturated) | docosahexaenoylcarnitine (C22:6)*         |
|             | 0,45  | 0,99 | 1,22  | 0,0479 | 0,9840 | Androgenic Steroids                                     | 16alpha-hydroxy DHEA 3-sulfate            |
|             | 0,46  | 0,80 | 0,92  | 0,0447 | 0,9840 | Androgenic Steroids                                     | andro steroid monosulfate C19H28O6S (1)*  |
|             | 1,72  | 0,69 | 1,11  | 0,0419 | 0,9840 | Secondary Bile Acid Metabolism                          | glycodeoxycholate                         |
| XENOBIOTICS |       |      |       |        |        |                                                         |                                           |
|             | 2,17  | 2,56 | 3,78  | 0,0140 | 0,8220 | Food Component/Plant                                    | 2,8-quinolinediol sulfate                 |
|             | 0,23  | 0,34 | 0,44  | 0,0404 | 0,9840 | Food Component/Plant                                    | 2-oxindole-3-acetate                      |
|             | 1,39  | 1,10 | 1,46  | 0,0115 | 0,8220 | Food Component/Plant                                    | 3-formylindole                            |
|             | 3,95  | 3,89 | 5,34  | 0,0217 | 0,9840 | Food Component/Plant                                    | vanillic acid glycine                     |
|             | 0,08  | 0,41 | 0,97  | 0,0211 | 0,9840 | Drug - Analgesics, Anesthetics                          | lidocaine                                 |
|             | 0,05  | 0,38 | 1,01  | 0,0251 | 0,9840 | Drug - Analgesics, Anesthetics                          | N-ethylglycinexylidide                    |
|             | 11,97 | 0,28 | 0,08  | 0,0153 | 0,8499 | Drug - Antibiotic                                       | trimethoprim                              |
|             | 5,35  | 5,08 | 3,10  | 0,0015 | 0,2685 | Drug - Cardiovascular                                   | metoprolol                                |
|             | 2,70  | 2,48 | 2,36  | 0,0016 | 0,2685 | Drug - Cardiovascular                                   | metoprolol acid metabolite*               |
|             | 3,24  | 3,11 | 3,26  | 0,0000 | 0,0123 | Drug - Cardiovascular                                   | alpha-hydroxymetoprolol                   |
|             | 1,12  | 1,13 | 1,10  | 0,0061 | 0,6072 | Drug - Cardiovascular                                   | warfarin                                  |
|             | 1,60  | 1,72 | 1,55  | 0,0010 | 0,2685 | Drug - Cardiovascular                                   | 6-hydroxywarfarin                         |
|             | 3,65  | 5,52 | 5,10  | 0,0020 | 0,2808 | Drug - Cardiovascular                                   | 7-hydroxywarfarin                         |
|             | 2,38  | 2,53 | 2,09  | 0,0007 | 0,2685 | Drug - Cardiovascular                                   | 10-hydroxywarfarin                        |
|             | 13,19 | 2,42 | 37,65 | 0,0048 | 0,5797 | Drug - Gastrointestinal                                 | pantoprazole                              |
|             | 0,47  | 0,55 | 0,69  | 0,0315 | 0,9840 | Drug - Respiratory                                      | De(carboxymethoxy) cetirizine acetic acid |
|             | 0,60  | 0,63 | 0,88  | 0,0052 | 0,5797 | Chemical                                                | 2-acrylamidoglycolic acid                 |

**Table S6.** Summary of individual metabolites between patients with Gram negative and Gram positive infection. All individual metabolites showing a significant difference in ANOVA analysis are listed. The metabolites are listed according to their classification. A ratio of mean levels (Gram-negative relative to Gram-positive infection) <1.00 is indicated by green (i.e. lower in Gram-negative infection) (\* The metabolite identity not confirmed based on a standard).

| SUBPATHWAY                                                       | IDENTITY                                                                                                                             |
|------------------------------------------------------------------|--------------------------------------------------------------------------------------------------------------------------------------|
| <b>AMINO ACIDS AND PEPTIDES (6/8 associated with SOFA score)</b> |                                                                                                                                      |
| Tryptophan Metabolism                                            | Tryptophan, 6-bromotryptophan                                                                                                        |
| Leucine, Isoleucine and Valine Metabolism                        | <b>N-acetylisoleucine</b>                                                                                                            |
| Methionine, Cysteine, SAM and Taurine Metabolism                 | <b>N-acetylmethionine sulfoxide</b>                                                                                                  |
| Fibrinogen Cleavage Peptide                                      | Fibrinopeptide A (5-16)*, fibrinopeptide A (7-16)*, fibrinopeptide A (8-16)**, <b>fibrinopeptide B (1-12)**</b>                      |
| <b>CARBOHYDRATE (2/4 associated with SOFA score)</b>             |                                                                                                                                      |
| Glycolysis, Gluconeogenesis, and Pyruvate Metabolism             | Glucose                                                                                                                              |
| Disaccharides and Oligosaccharides                               | Sucrose                                                                                                                              |
| Fructose, Mannose and Galactose Metabolism                       | Mannitol/sorbitol                                                                                                                    |
| Fructose, Mannose and Galactose Metabolism                       | Galactonate                                                                                                                          |
| <b>LIPIDS (6/10 associated with SOFA score)</b>                  |                                                                                                                                      |
| Short Chain Fatty Acid                                           | Butyrate/isobutyrate (4:0)                                                                                                           |
| Long Chain Polyunsaturated Fatty Acid (n3 and n6)                | <b>Mead acid (20:3n9)</b>                                                                                                            |
| Fatty Acid, Dicarboxylate                                        | <b>Adipate (C6-DC)</b> , hydroxy-CMPF*                                                                                               |
| Fatty Acid Metabolism (also BCAA Metabolism)                     | <b>Propionylglycine</b>                                                                                                              |
| Fatty Acid Metabolism (Acyl Carnitine, Monounsaturated)          | <b>3-decenoylcarnitine</b>                                                                                                           |
| Fatty Acid Metabolism (Acyl Carnitine, Polyunsaturated)          | Cocosaheptaenoylcarnitine (C22:6)*                                                                                                   |
| Androgenic Steroids                                              | 16alpha-hydroxy DHEA 3-sulfate, <b>andro steroid monosulfate C19H28O6S (1)*</b>                                                      |
| Secondary Bile Acid Metabolism                                   | Glycodeoxycholate                                                                                                                    |
| <b>XENOBIOTICS (5/17 associated with SOFA score)</b>             |                                                                                                                                      |
| Food Component/Plant                                             | 2,8-quinolinediol sulfate, <b>2-oxindole-3-acetate</b> , 3-formylindole, vanillic acid glycine                                       |
| Drug - Analgesics, Anesthetics                                   | <b>Lidocaine, N-ethylglycinexylidide</b>                                                                                             |
| Drug - Antibiotic                                                | Trimethoprim                                                                                                                         |
| Drug - Cardiovascular                                            | Metoprolol, metoprolol acid metabolite*, alpha-hydroxymetoprolol, warfarin, 6-hydroxywarfarin, 7-hydroxywarfarin, 10-hydroxywarfarin |
| Drug - Gastrointestinal                                          | Pantoprazole                                                                                                                         |
| Drug - Respiratory                                               | <b>De(carboxymethoxy) cetirizine acetic acid</b>                                                                                     |
| Chemical                                                         | <b>2-acrylamidoglycolic acid</b>                                                                                                     |

**Table S7.** Subclassification of the 42 metabolites showing the strongest correlation with total SOFA score, i.e. a p-value <0.05 and a correlation factor >0.6 when using the Pearson test. All metabolites showed a Pearson's q value <0.00005. The metabolites are listed according to their position from left to right in the unsupervised hierarchical clustering analysis based on the serum level of these 42 metabolites. The classification of individual metabolites according to the main metabolic pathway is indicated by a color code in the left color. More detailed presentation of the results from the Pearson's test for individual metabolites are included in Table S8. Based on the metabolite clustering the individual metabolites were classified into four main subset, and the separation of individual metabolite clusters is indicated by bright green color in the left column (\* The metabolite identity not confirmed based on a standard).

| Main pathway | Sub Pathway                                      | Biochemical Name                                 | Position/ranging according to the cluster presented in Figure 1. | Main metabolite cluster/subset |
|--------------|--------------------------------------------------|--------------------------------------------------|------------------------------------------------------------------|--------------------------------|
| Amino Acid   | Tyrosine Metabolism                              | 3-(4-hydroxyphenyl)lactate                       | 1                                                                | A (left)                       |
| Amino Acid   | Phenylalanine Metabolism                         | phenyllactate (PLA)                              | 2                                                                |                                |
| Amino Acid   | Methionine, Cysteine, SAM and Taurine Metabolism | 2-hydroxy-4-(methylthio)butanoic acid            | 3                                                                |                                |
| Amino Acid   | Polyamine Metabolism                             | (N(1) + N(8))-acetylspermidine                   | 4                                                                |                                |
| Amino Acid   | Lysine Metabolism                                | N6-acetyllysine                                  | 5                                                                |                                |
| Nucleotide   | Purine Metabolism, Adenine containing            | N1-methyladenosine                               | 6                                                                |                                |
| Nucleotide   | Purine Metabolism, Guanine containing            | 7-methylguanine                                  | 7                                                                |                                |
| Xenobiotics  | Chemical                                         | sulfate*                                         | 8                                                                |                                |
| Amino Acid   | Lysine Metabolism                                | N6,N6,N6-trimethyllysine                         | 9                                                                |                                |
| Lipid        | Fatty Acid, Dicarboxylate                        | 2-hydroxyglutarate                               | 10                                                               |                                |
| Nucleotide   | Pyrimidine Metabolism, Uracil containing         | Uracil                                           | 11                                                               |                                |
| Lipid        | Fatty Acid, Dihydroxy                            | 2S,3R-dihydroxybutyrate                          | 12                                                               |                                |
| Amino Acid   | Urea cycle; Arginine and Proline Metabolism      | Urea                                             | 13                                                               |                                |
|              |                                                  |                                                  |                                                                  |                                |
| Lipid        | Progestin Steroids                               | 5alpha-pregnan-3beta,20beta-diol monosulfate (1) | 14                                                               | B (left middle)                |
| Lipid        | Progestin Steroids                               | pregnanolone/allopregnanolone sulfate            | 15                                                               |                                |
| Amino Acid   | Leucine, Isoleucine and Valine Metabolism        | Isovalerylglycine                                | 16                                                               |                                |
| Amino Acid   | Leucine, Isoleucine and Valine Metabolism        | 2-methylbutyrylglycine                           | 17                                                               |                                |
| Energy       | TCA Cycle                                        | succinylcarnitine (C4-DC)                        | 18                                                               |                                |
| Amino Acid   | Lysine Metabolism                                | glutaryl carnitine (C5-DC)                       | 19                                                               |                                |
| Amino Acid   | Tryptophan Metabolism                            | xanthurenate                                     | 20                                                               |                                |
|              |                                                  |                                                  |                                                                  |                                |

|             |                                                  |                                        |    |                  |
|-------------|--------------------------------------------------|----------------------------------------|----|------------------|
| Amino Acid  | Tryptophan Metabolism                            | N-acetylkynurenine (2)                 | 21 | C (right middle) |
| Lipid       | Fatty Acid Metabolism (Acyl Glycine)             | picolinoylglycine                      | 22 |                  |
| Amino Acid  | Tryptophan Metabolism                            | picolinate                             | 23 |                  |
| Amino Acid  | Tyrosine Metabolism                              | N-acetyltyrosine                       | 24 |                  |
| Amino Acid  | Phenylalanine Metabolism                         | N-acetylphenylalanine                  | 25 |                  |
| Amino Acid  | Alanine and Aspartate Metabolism                 | N-acetylaspartate (NAA)                | 26 |                  |
| Amino Acid  | Glutamate Metabolism                             | N-acetylglutamate                      | 27 |                  |
| Amino Acid  | Glycine, Serine and Threonine Metabolism         | N-acetylthreonine                      | 28 |                  |
| Amino Acid  | Polyamine Metabolism                             | N-acetyl-isoputresnine                 | 29 |                  |
| Xenobiotics | Food Component/Plant                             | erythritol                             | 30 |                  |
| Amino Acid  | Methionine, Cysteine, SAM and Taurine Metabolism | N-acetyltaurine                        | 31 |                  |
| Nucleotide  | Pyrimidine Metabolism, Cytidine containing       | N4-acetylcytidine                      | 32 |                  |
| Amino Acid  | Polyamine Metabolism                             | N-acetylputrescine                     | 33 |                  |
| Amino Acid  | Tyrosine Metabolism                              | vanillylmandelate (VMA)                | 34 |                  |
| Amino Acid  | Tryptophan Metabolism                            | kynurenate                             | 35 |                  |
|             |                                                  |                                        |    |                  |
| Lipid       | Inositol Metabolism                              | myo-inositol                           | 36 | D (right)        |
| Lipid       | Primary Bile Acid Metabolism                     | taurochenodeoxycholate                 | 37 |                  |
| Lipid       | Progestin Steroids                               | 5alpha-pregnan-3beta-ol,20-one sulfate | 38 |                  |
| Lipid       | Progestin Steroids                               | 5alpha-pregnan-diol disulfate          | 39 |                  |
| Lipid       | Pregnenolone Steroids                            | 21-hydroxypregnenolone disulfate       | 40 |                  |
| Lipid       | Pregnenolone Steroids                            | pregnenediol disulfate (C21H34O8S2)*   | 41 |                  |
| Lipid       | Secondary Bile Acid Metabolism                   | taurochenolate sulfate*                | 42 |                  |

**Table S8.** The correlation between the serum level of individual metabolites and the total SOFA score; a list presenting all metabolites that showed a p-value corresponding to <0.05 when using the Pearson's correlation test. The table presents the main metabolic pathway, the subpathway, the identity of the metabolite, and the Pearson p. q and the correlation values. The correlation values are presented as the absolute values, and negative values are marked with green color. The classification of each metabolite with regard to the main metabolic pathway is indicated by a color code in the left column for metabolites showing an absolute correlation value exceeding 0.5 (\* The metabolite identity not confirmed based on a standard).

| Main pathway | Sub Pathway                                 | Biochemical Name                                 | Pearson p | Pearson q | Pearson correlation |
|--------------|---------------------------------------------|--------------------------------------------------|-----------|-----------|---------------------|
| Amino Acid   | Tyrosine Metabolism                         | 3-(4-hydroxyphenyl)lactate                       | 0,0000    | 0,0000    | 0,7805              |
| Amino Acid   | Phenylalanine Metabolism                    | phenyllactate (PLA)                              | 0,0000    | 0,0000    | 0,7061              |
| Lipid        | Progestin Steroids                          | 5alpha-pregnan-3beta,20beta-diol monosulfate (1) | 0,0000    | 0,0000    | 0,6905              |
| Amino Acid   | Tryptophan Metabolism                       | N-acetylkynurenine (2)                           | 0,0000    | 0,0000    | 0,6883              |
| Amino Acid   | Leucine, Isoleucine and Valine Metabolism   | isovalerylglycine                                | 0,0000    | 0,0000    | 0,6793              |
| Lipid        | Secondary Bile Acid Metabolism              | taurocholate sulfate*                            | 0,0000    | 0,0000    | 0,6763              |
| Energy       | TCA Cycle                                   | succinylcarnitine (C4-DC)                        | 0,0000    | 0,0000    | 0,6734              |
| Amino Acid   | Tryptophan Metabolism                       | picolinate                                       | 0,0000    | 0,0000    | 0,6712              |
| Lipid        | Progestin Steroids                          | 5alpha-pregnan-3beta-ol,20-one sulfate           | 0,0000    | 0,0000    | 0,6636              |
| Amino Acid   | Lysine Metabolism                           | N6-acetyllysine                                  | 0,0000    | 0,0000    | 0,6611              |
| Lipid        | Fatty Acid Metabolism (Acyl Glycine)        | picolinoylglycine                                | 0,0000    | 0,0000    | 0,6596              |
| Nucleotide   | Pyrimidine Metabolism, Uracil containing    | uracil                                           | 0,0000    | 0,0000    | 0,6595              |
| Lipid        | Progestin Steroids                          | pregnanolone/allopregnanolone sulfate            | 0,0000    | 0,0000    | 0,6579              |
| Lipid        | Fatty Acid, Dihydroxy                       | 2S,3R-dihydroxybutyrate                          | 0,0000    | 0,0000    | 0,6506              |
| Amino Acid   | Tyrosine Metabolism                         | N-acetyltyrosine                                 | 0,0000    | 0,0000    | 0,6487              |
| Nucleotide   | Purine Metabolism, Guanine containing       | 7-methylguanine                                  | 0,0000    | 0,0000    | 0,6439              |
| Amino Acid   | Urea cycle; Arginine and Proline Metabolism | urea                                             | 0,0000    | 0,0000    | 0,6432              |
| Amino Acid   | Lysine Metabolism                           | N6,N6,N6-trimethyllysine                         | 0,0000    | 0,0000    | 0,6426              |
| Amino Acid   | Tyrosine Metabolism                         | vanillylmandelate (VMA)                          | 0,0000    | 0,0000    | 0,6425              |
| Amino Acid   | Polyamine Metabolism                        | N-acetylputrescine                               | 0,0000    | 0,0000    | 0,6404              |
| Lipid        | Inositol Metabolism                         | myo-inositol                                     | 0,0000    | 0,0000    | 0,6376              |
| Amino Acid   | Leucine, Isoleucine and Valine Metabolism   | 2-methylbutyrylglycine                           | 0,0000    | 0,0000    | 0,6360              |
| Amino Acid   | Polyamine Metabolism                        | N-acetyl-isoputrescine                           | 0,0000    | 0,0000    | 0,6338              |
| Amino Acid   | Polyamine Metabolism                        | (N(1) + N(8))-acetylspermidine                   | 0,0000    | 0,0000    | 0,6333              |

|                        |                                                  |                                             |        |        |        |
|------------------------|--------------------------------------------------|---------------------------------------------|--------|--------|--------|
| Amino Acid             | Alanine and Aspartate Metabolism                 | N-acetylaspartate (NAA)                     | 0,0000 | 0,0000 | 0,6330 |
| Lipid                  | Progestin Steroids                               | 5alpha-pregnan-diol disulfate               | 0,0000 | 0,0000 | 0,6320 |
| Amino Acid             | Methionine, Cysteine, SAM and Taurine Metabolism | 2-hydroxy-4-(methylthio)butanoic acid       | 0,0000 | 0,0000 | 0,6315 |
| Amino Acid             | Tryptophan Metabolism                            | kynurenate                                  | 0,0000 | 0,0000 | 0,6284 |
| Amino Acid             | Lysine Metabolism                                | glutaryl carnitine (C5-DC)                  | 0,0000 | 0,0000 | 0,6264 |
| Lipid                  | Pregnenolone Steroids                            | pregnenediol disulfate (C21H34O8S2)*        | 0,0000 | 0,0000 | 0,6248 |
| Lipid                  | Pregnenolone Steroids                            | 21-hydroxypregnenolone disulfate            | 0,0000 | 0,0000 | 0,6244 |
| Amino Acid             | Glycine, Serine and Threonine Metabolism         | N-acetylthreonine                           | 0,0000 | 0,0000 | 0,6220 |
| Amino Acid             | Phenylalanine Metabolism                         | N-acetylphenylalanine                       | 0,0000 | 0,0000 | 0,6178 |
| Nucleotide             | Purine Metabolism, Adenine containing            | N1-methyladenosine                          | 0,0000 | 0,0000 | 0,6145 |
| Amino Acid             | Tryptophan Metabolism                            | xanthurenate                                | 0,0000 | 0,0000 | 0,6139 |
| Lipid                  | Fatty Acid, Dicarboxylate                        | 2-hydroxyglutarate                          | 0,0000 | 0,0000 | 0,6134 |
| Nucleotide             | Pyrimidine Metabolism, Cytidine containing       | N4-acetylcytidine                           | 0,0000 | 0,0000 | 0,6125 |
| Lipid                  | Primary Bile Acid Metabolism                     | taurochenodeoxycholate                      | 0,0000 | 0,0000 | 0,6078 |
| Xenobiotics            | Chemical                                         | sulfate*                                    | 0,0000 | 0,0000 | 0,6072 |
| Amino Acid             | Methionine, Cysteine, SAM and Taurine Metabolism | N-acetyltaurine                             | 0,0000 | 0,0000 | 0,6067 |
| Xenobiotics            | Food Component/Plant                             | erythritol                                  | 0,0000 | 0,0000 | 0,6017 |
| Amino Acid             | Glutamate Metabolism                             | N-acetylglutamate                           | 0,0000 | 0,0000 | 0,6010 |
|                        |                                                  |                                             |        |        |        |
| Amino Acid             | Polyamine Metabolism                             | 4-acetamidobutanoate                        | 0,0000 | 0,0000 | 0,5971 |
| Carbohydrate           | Pentose Metabolism                               | arabitol/xylitol                            | 0,0000 | 0,0000 | 0,5928 |
| Xenobiotics            | Chemical                                         | 2-methoxyresorcinol sulfate                 | 0,0000 | 0,0000 | 0,5919 |
| Nucleotide             | Purine Metabolism, Adenine containing            | adenosine 3',5'-cyclic monophosphate (cAMP) | 0,0000 | 0,0000 | 0,5916 |
| Amino Acid             | Leucine, Isoleucine and Valine Metabolism        | tiglylcarnitine (C5:1-DC)                   | 0,0000 | 0,0000 | 0,5910 |
| Amino Acid             | Urea cycle; Arginine and Proline Metabolism      | argininate*                                 | 0,0000 | 0,0000 | 0,5904 |
| Cofactors and Vitamins | Nicotinate and Nicotinamide Metabolism           | 1-methylnicotinamide                        | 0,0000 | 0,0000 | 0,5882 |
| Amino Acid             | Histidine Metabolism                             | N-acetylhistidine                           | 0,0000 | 0,0000 | 0,5864 |
| Lipid                  | Pregnenolone Steroids                            | pregnenetriol disulfate*                    | 0,0000 | 0,0000 | 0,5848 |
| Carbohydrate           | Aminosugar Metabolism                            | N-acetylneuraminate                         | 0,0000 | 0,0000 | 0,5829 |

|                        |                                                  |                                                  |        |        |        |
|------------------------|--------------------------------------------------|--------------------------------------------------|--------|--------|--------|
| Amino Acid             | Tryptophan Metabolism                            | indoleacetylglutamine                            | 0,0000 | 0,0000 | 0,5813 |
| Amino Acid             | Alanine and Aspartate Metabolism                 | N-acetylalanine                                  | 0,0000 | 0,0000 | 0,5786 |
| Carbohydrate           | Aminosugar Metabolism                            | N-acetylglucosaminylasparagine                   | 0,0000 | 0,0000 | 0,5784 |
| Nucleotide             | Pyrimidine Metabolism, Uracil containing         | 3-(3-amino-3-carboxypropyl)uridine*              | 0,0000 | 0,0000 | 0,5776 |
| Amino Acid             | Leucine, Isoleucine and Valine Metabolism        | 2,3-dihydroxy-2-methylbutyrate                   | 0,0000 | 0,0000 | 0,5764 |
| Lipid                  | Androgenic Steroids                              | 5alpha-androstan-3alpha,17alpha-diol disulfate   | 0,0000 | 0,0000 | 0,5751 |
| Amino Acid             | Methionine, Cysteine, SAM and Taurine Metabolism | 2,3-dihydroxy-5-methylthio-4-pentenoate (DMTPA)* | 0,0000 | 0,0000 | 0,5733 |
| Amino Acid             | Glycine, Serine and Threonine Metabolism         | sarcosine                                        | 0,0000 | 0,0000 | 0,5732 |
| Lipid                  | Carnitine Metabolism                             | deoxycarnitine                                   | 0,0000 | 0,0000 | 0,5726 |
| Cofactors and Vitamins | Nicotinate and Nicotinamide Metabolism           | quinolinate                                      | 0,0000 | 0,0000 | 0,5675 |
| Amino Acid             | Polyamine Metabolism                             | N1,N12-diacetylspermine                          | 0,0000 | 0,0000 | 0,5670 |
| Lipid                  | Pregnenolone Steroids                            | pregnenolone sulfate                             | 0,0000 | 0,0000 | 0,5643 |
| Xenobiotics            | Bacterial/Fungal                                 | N-methylpipecolate                               | 0,0000 | 0,0000 | 0,5636 |
| Lipid                  | Primary Bile Acid Metabolism                     | glycocholate                                     | 0,0000 | 0,0000 | 0,5626 |
| Lipid                  | Secondary Bile Acid Metabolism                   | taurochenodeoxycholic acid 3-sulfate             | 0,0000 | 0,0000 | 0,5623 |
| Amino Acid             | Leucine, Isoleucine and Valine Metabolism        | beta-hydroxyisovaleroylcarnitine                 | 0,0000 | 0,0000 | 0,5610 |
| Nucleotide             | Pyrimidine Metabolism, Uracil containing         | 5,6-dihydrouridine                               | 0,0000 | 0,0000 | 0,5602 |
| Nucleotide             | Pyrimidine Metabolism, Uracil containing         | pseudouridine                                    | 0,0000 | 0,0000 | 0,5595 |
| Lipid                  | Pregnenolone Steroids                            | pregnenediol sulfate (C21H34O5S)*                | 0,0000 | 0,0000 | 0,5592 |
| Amino Acid             | Lysine Metabolism                                | N-acetyl-2-aminoadipate                          | 0,0000 | 0,0000 | 0,5575 |
| Amino Acid             | Leucine, Isoleucine and Valine Metabolism        | N-acetylvaline                                   | 0,0000 | 0,0000 | 0,5558 |
| Amino Acid             | Creatine Metabolism                              | creatine                                         | 0,0000 | 0,0000 | 0,5549 |
| Amino Acid             | Histidine Metabolism                             | formiminoglutamate                               | 0,0000 | 0,0000 | 0,5543 |
| Carbohydrate           | Aminosugar Metabolism                            | N-acetylglucosamine/N-acetylgalactosamine        | 0,0000 | 0,0000 | 0,5520 |
| Amino Acid             | Phenylalanine Metabolism                         | phenylpyruvate                                   | 0,0000 | 0,0000 | 0,5518 |
| Amino Acid             | Lysine Metabolism                                | hydroxy-N6,N6,N6-trimethyllysine*                | 0,0000 | 0,0000 | 0,5512 |
| Lipid                  | Androgenic Steroids                              | androstenediol (3beta,17beta) disulfate (2)      | 0,0000 | 0,0000 | 0,5510 |
| Lipid                  | Secondary Bile Acid Metabolism                   | glycoursodeoxycholic acid sulfate (2)            | 0,0000 | 0,0000 | 0,5500 |
| Amino Acid             | Leucine, Isoleucine and Valine Metabolism        | methylsuccinate                                  | 0,0000 | 0,0000 | 0,5467 |

|                        |                                                      |                                                   |        |        |        |
|------------------------|------------------------------------------------------|---------------------------------------------------|--------|--------|--------|
| Lipid                  | Secondary Bile Acid Metabolism                       | tauroolithocholate 3-sulfate                      | 0,0000 | 0,0000 | 0,5420 |
| Amino Acid             | Leucine, Isoleucine and Valine Metabolism            | isobutyrylglycine                                 | 0,0000 | 0,0000 | 0,5417 |
| Nucleotide             | Pyrimidine Metabolism, Uracil containing             | N-acetyl-beta-alanine                             | 0,0000 | 0,0000 | 0,5417 |
| Lipid                  | Primary Bile Acid Metabolism                         | glycochenodeoxycholate 3-sulfate                  | 0,0000 | 0,0000 | 0,5416 |
| Lipid                  | Pregnenolone Steroids                                | pregnenetriol sulfate*                            | 0,0000 | 0,0000 | 0,5409 |
| Lipid                  | Primary Bile Acid Metabolism                         | glycochenodeoxycholate                            | 0,0000 | 0,0000 | 0,5409 |
| Nucleotide             | Purine Metabolism, Adenine containing                | N6-succinyladenosine                              | 0,0000 | 0,0000 | 0,5409 |
| Amino Acid             | Glycine, Serine and Threonine Metabolism             | N-acetylserine                                    | 0,0000 | 0,0000 | 0,5393 |
| Lipid                  | Fatty Acid, Dicarboxylate                            | decadienedioic acid (C10:2-DC)**                  | 0,0000 | 0,0000 | 0,5393 |
| Amino Acid             | Tyrosine Metabolism                                  | 4-hydroxyphenylpyruvate                           | 0,0000 | 0,0000 | 0,5388 |
| Amino Acid             | Glutamate Metabolism                                 | N-acetyl-aspartyl-glutamate (NAAG)                | 0,0000 | 0,0000 | 0,5387 |
| Lipid                  | Secondary Bile Acid Metabolism                       | glycolithocholate sulfate*                        | 0,0000 | 0,0000 | 0,5385 |
| Amino Acid             | Tryptophan Metabolism                                | 5-hydroxyindoleacetate                            | 0,0000 | 0,0000 | 0,5384 |
| Amino Acid             | Creatine Metabolism                                  | creatinine                                        | 0,0000 | 0,0000 | 0,5371 |
| Energy                 | TCA Cycle                                            | 2-methylcitrate/homocitrate                       | 0,0000 | 0,0000 | 0,5351 |
| Amino Acid             | Histidine Metabolism                                 | N-acetylcarnosine                                 | 0,0000 | 0,0000 | 0,5347 |
| Carbohydrate           | Aminosugar Metabolism                                | erythronate*                                      | 0,0000 | 0,0000 | 0,5337 |
| Amino Acid             | Histidine Metabolism                                 | 1-methyl-4-imidazoleacetate                       | 0,0000 | 0,0000 | 0,5333 |
| Carbohydrate           | Aminosugar Metabolism                                | glucuronate                                       | 0,0000 | 0,0000 | 0,5329 |
| Amino Acid             | Leucine, Isoleucine and Valine Metabolism            | 3-methylglutaconate                               | 0,0000 | 0,0000 | 0,5316 |
| Lipid                  | Progestin Steroids                                   | 5alpha-pregnan-3beta,20alpha-diol monosulfate (2) | 0,0000 | 0,0001 | 0,5298 |
| Peptide                | Gamma-glutamyl Amino Acid                            | gamma-glutamyl-epsilon-lysine                     | 0,0000 | 0,0001 | 0,5273 |
| Lipid                  | Fatty Acid Metabolism (Acyl Carnitine, Medium Chain) | hexanoylcarnitine (C6)                            | 0,0000 | 0,0001 | 0,5266 |
| Amino Acid             | Tryptophan Metabolism                                | indole-3-carboxylate                              | 0,0000 | 0,0001 | 0,5262 |
| Cofactors and Vitamins | Ascorbate and Aldarate Metabolism                    | 2-O-methylascorbic acid                           | 0,0000 | 0,0001 | 0,5232 |
| Lipid                  | Secondary Bile Acid Metabolism                       | glycodeoxycholate 3-sulfate                       | 0,0000 | 0,0001 | 0,5221 |
| Cofactors and Vitamins | Tocopherol Metabolism                                | alpha-CEHC sulfate                                | 0,0000 | 0,0001 | 0,5218 |
| Lipid                  | Fatty Acid, Dihydroxy                                | 2R,3R-dihydroxybutyrate                           | 0,0000 | 0,0001 | 0,5207 |
| Amino Acid             | Leucine, Isoleucine and Valine Metabolism            | tigloylglycine                                    | 0,0000 | 0,0001 | 0,5160 |

|             |                                                      |                                        |        |        |        |
|-------------|------------------------------------------------------|----------------------------------------|--------|--------|--------|
| Amino Acid  | Glutamate Metabolism                                 | N-acetylglutamine                      | 0,0000 | 0,0001 | 0,5158 |
| Amino Acid  | Tryptophan Metabolism                                | 8-methoxykynurenate                    | 0,0000 | 0,0001 | 0,5157 |
| Lipid       | Secondary Bile Acid Metabolism                       | taurohyocholate*                       | 0,0000 | 0,0001 | 0,5147 |
| Lipid       | Secondary Bile Acid Metabolism                       | taurodeoxycholic acid 3-sulfate        | 0,0000 | 0,0001 | 0,5146 |
| Amino Acid  | Urea cycle; Arginine and Proline Metabolism          | 2-oxoarginine*                         | 0,0000 | 0,0001 | 0,5137 |
| Amino Acid  | Methionine, Cysteine, SAM and Taurine Metabolism     | N-formylmethionine                     | 0,0000 | 0,0001 | 0,5136 |
| Lipid       | Primary Bile Acid Metabolism                         | glycochenodeoxycholate glucuronide (1) | 0,0000 | 0,0001 | 0,5130 |
| Lipid       | Fatty Acid Metabolism (Acyl Carnitine, Hydroxy)      | 3-hydroxyoctanoylcarnitine (1)         | 0,0000 | 0,0001 | 0,5120 |
| Lipid       | Primary Bile Acid Metabolism                         | glycocholate sulfate                   | 0,0000 | 0,0001 | 0,5114 |
| Nucleotide  | Purine Metabolism, Guanine containing                | N2,N2-dimethylguanosine                | 0,0000 | 0,0001 | 0,5102 |
| Amino Acid  | Tryptophan Metabolism                                | kynurenine                             | 0,0000 | 0,0001 | 0,5093 |
| Lipid       | Fatty Acid, Dicarboxylate                            | tetradecadienedioate (C14:2-DC)*       | 0,0000 | 0,0001 | 0,5082 |
| Nucleotide  | Purine Metabolism, Adenine containing                | N6-carbamoylthreonyladenosine          | 0,0000 | 0,0001 | 0,5081 |
| Amino Acid  | Methionine, Cysteine, SAM and Taurine Metabolism     | 5-methylthioribose**                   | 0,0000 | 0,0001 | 0,5078 |
| Amino Acid  | Histidine Metabolism                                 | 1-methylhistidine                      | 0,0000 | 0,0001 | 0,5072 |
| Lipid       | Phospholipid Metabolism                              | glycerophosphorylcholine (GPC)         | 0,0000 | 0,0001 | 0,5069 |
| Lipid       | Sphingosines                                         | sphingosine 1-phosphate                | 0,0000 | 0,0001 | 0,5067 |
| Lipid       | Secondary Bile Acid Metabolism                       | glycohyocholate                        | 0,0000 | 0,0001 | 0,5023 |
| Amino Acid  | Tyrosine Metabolism                                  | thyroxine                              | 0,0000 | 0,0001 | 0,5020 |
| Peptide     | Acetylated Peptides                                  | phenylacetylglutamate                  | 0,0000 | 0,0001 | 0,5008 |
| Lipid       | Lysophospholipid                                     | 1-palmitoyl-GPA (16:0)                 | 0,0000 | 0,0001 | 0,5006 |
| Lipid       | Secondary Bile Acid Metabolism                       | glycocholenate sulfate*                | 0,0000 | 0,0001 | 0,4994 |
| Amino Acid  | Histidine Metabolism                                 | N-acetyl-1-methylhistidine*            | 0,0000 | 0,0001 | 0,4991 |
| Xenobiotics | Tobacco Metabolite                                   | 3-hydroxycotinine glucuronide          | 0,0000 | 0,0001 | 0,4991 |
| Lipid       | Fatty Acid, Dicarboxylate                            | maleate                                | 0,0001 | 0,0002 | 0,4984 |
| Amino Acid  | Urea cycle; Arginine and Proline Metabolism          | N-acetylcitrulline                     | 0,0001 | 0,0002 | 0,4982 |
| Nucleotide  | Purine Metabolism, (Hypo)Xanthine/Inosine containing | N1-methylinosine                       | 0,0001 | 0,0002 | 0,4957 |
| Amino Acid  | Histidine Metabolism                                 | imidazole lactate                      | 0,0001 | 0,0002 | 0,4956 |
| Lipid       | Primary Bile Acid Metabolism                         | taurocholate                           | 0,0001 | 0,0002 | 0,4954 |

|                        |                                                       |                                             |        |        |        |
|------------------------|-------------------------------------------------------|---------------------------------------------|--------|--------|--------|
| Peptide                | Gamma-glutamyl Amino Acid                             | gamma-glutamylhistidine                     | 0,0001 | 0,0002 | 0,4946 |
| Amino Acid             | Guanidino and Acetamido Metabolism                    | guanidinosuccinate                          | 0,0001 | 0,0002 | 0,4937 |
| Nucleotide             | Pyrimidine Metabolism, Uracil containing              | 5,6-dihydrouracil                           | 0,0001 | 0,0002 | 0,4928 |
| Carbohydrate           | Fructose, Mannose and Galactose Metabolism            | galactonate                                 | 0,0001 | 0,0002 | 0,4924 |
| Lipid                  | Corticosteroids                                       | tetrahydrocortisol sulfate (1)              | 0,0001 | 0,0002 | 0,4908 |
| Xenobiotics            | Benzoate Metabolism                                   | 4-hydroxybenzoate                           | 0,0001 | 0,0002 | 0,4873 |
| Lipid                  | Progestin Steroids                                    | 5alpha-pregnan-3beta,20alpha-diol disulfate | 0,0001 | 0,0002 | 0,4870 |
| Amino Acid             | Tryptophan Metabolism                                 | indolelactate                               | 0,0001 | 0,0002 | 0,4863 |
| Amino Acid             | Lysine Metabolism                                     | 5-(galactosylhydroxy)-lysine                | 0,0001 | 0,0002 | 0,4855 |
| Xenobiotics            | Chemical                                              | trizma acetate                              | 0,0001 | 0,0002 | 0,4854 |
| Xenobiotics            | Benzoate Metabolism                                   | 2-ethylphenylsulfate                        | 0,0001 | 0,0002 | 0,4850 |
| Nucleotide             | Pyrimidine Metabolism, Thymine containing             | 5,6-dihydrothymine                          | 0,0001 | 0,0002 | 0,4841 |
| Lipid                  | Fatty Acid Metabolism (Acyl Carnitine, Dicarboxylate) | adipoylcarnitine (C6-DC)                    | 0,0001 | 0,0002 | 0,4839 |
| Lipid                  | Progestin Steroids                                    | pregnenediol-3-glucuronide                  | 0,0001 | 0,0002 | 0,4839 |
| Xenobiotics            | Drug - Analgesics, Anesthetics                        | methadone                                   | 0,0001 | 0,0002 | 0,4839 |
| Lipid                  | Fatty Acid, Dicarboxylate                             | hexadecenedioate (C16:1-DC)*                | 0,0001 | 0,0002 | 0,4834 |
| Xenobiotics            | Food Component/Plant                                  | 2-keto-3-deoxy-gluconate                    | 0,0001 | 0,0003 | 0,4802 |
| Amino Acid             | Histidine Metabolism                                  | 1-ribosyl-imidazoleacetate*                 | 0,0001 | 0,0003 | 0,4784 |
| Amino Acid             | Glutamate Metabolism                                  | carboxyethyl-GABA                           | 0,0001 | 0,0003 | 0,4775 |
| Amino Acid             | Leucine, Isoleucine and Valine Metabolism             | isovalerylcarnitine (C5)                    | 0,0001 | 0,0003 | 0,4770 |
| Amino Acid             | Urea cycle; Arginine and Proline Metabolism           | N-acetylproline                             | 0,0001 | 0,0003 | 0,4768 |
| Nucleotide             | Purine Metabolism, (Hypo)Xanthine/Inosine containing  | hypoxanthine                                | 0,0001 | 0,0003 | 0,4762 |
| Nucleotide             | Purine Metabolism, Adenine containing                 | N6-methyladenosine                          | 0,0001 | 0,0003 | 0,4749 |
| Lipid                  | Fatty Acid Metabolism (Acyl Carnitine, Hydroxy)       | 3-hydroxydecanoylcarnitine                  | 0,0001 | 0,0003 | 0,4735 |
| Amino Acid             | Tryptophan Metabolism                                 | C-glycosyltryptophan                        | 0,0001 | 0,0003 | 0,4722 |
| Lipid                  | Mevalonate Metabolism                                 | 3-hydroxy-3-methylglutarate                 | 0,0001 | 0,0003 | 0,4721 |
| Amino Acid             | Leucine, Isoleucine and Valine Metabolism             | isobutyrylcarnitine (C4)                    | 0,0001 | 0,0003 | 0,4716 |
| Cofactors and Vitamins | Tocopherol Metabolism                                 | alpha-CMBHC glucuronide                     | 0,0001 | 0,0003 | 0,4712 |
| Xenobiotics            | Benzoate Metabolism                                   | 3-methoxycatechol sulfate (1)               | 0,0001 | 0,0004 | 0,4709 |

|                        |                                                         |                                              |        |        |        |
|------------------------|---------------------------------------------------------|----------------------------------------------|--------|--------|--------|
| Amino Acid             | Polyamine Metabolism                                    | 5-methylthioadenosine (MTA)                  | 0,0002 | 0,0004 | 0,4693 |
| Lipid                  | Secondary Bile Acid Metabolism                          | isoursodeoxycholate sulfate (1)              | 0,0002 | 0,0004 | 0,4689 |
| Amino Acid             | Polyamine Metabolism                                    | acisoga                                      | 0,0002 | 0,0004 | 0,4688 |
| Lipid                  | Secondary Bile Acid Metabolism                          | glycoursodeoxycholic acid sulfate (1)        | 0,0002 | 0,0004 | 0,4681 |
| Xenobiotics            | Chemical                                                | 2-acrylamidoglycolic acid                    | 0,0002 | 0,0004 | 0,4670 |
| Amino Acid             | Tyrosine Metabolism                                     | N-formylphenylalanine                        | 0,0002 | 0,0004 | 0,4661 |
| Lipid                  | Secondary Bile Acid Metabolism                          | tauroursodeoxycholic acid sulfate (1)        | 0,0002 | 0,0004 | 0,4641 |
| Lipid                  | Estrogenic Steroids                                     | estrone 3-sulfate                            | 0,0002 | 0,0005 | 0,4625 |
| Amino Acid             | Methionine, Cysteine, SAM and Taurine Metabolism        | S-adenosylhomocysteine (SAH)                 | 0,0002 | 0,0005 | 0,4618 |
| Xenobiotics            | Chemical                                                | S-(3-hydroxypropyl)mercapturic acid (HPMA)   | 0,0002 | 0,0005 | 0,4611 |
| Amino Acid             | Urea cycle; Arginine and Proline Metabolism             | N,N,N-trimethyl-alanylproline betaine (TMAP) | 0,0002 | 0,0005 | 0,4598 |
| Amino Acid             | Alanine and Aspartate Metabolism                        | asparagine                                   | 0,0002 | 0,0005 | 0,4581 |
| Lipid                  | Primary Bile Acid Metabolism                            | tauro-beta-muricholate                       | 0,0002 | 0,0005 | 0,4577 |
| Lipid                  | Fatty Acid Metabolism (Acyl Carnitine, Monounsaturated) | 3-decenoylcarnitine                          | 0,0002 | 0,0005 | 0,4571 |
| Xenobiotics            | Chemical                                                | 2-naphthol sulfate                           | 0,0002 | 0,0005 | 0,4566 |
| Cofactors and Vitamins | Nicotinate and Nicotinamide Metabolism                  | N1-methyl-2-pyridone-5-carboxamide           | 0,0002 | 0,0005 | 0,4563 |
| Amino Acid             | Leucine, Isoleucine and Valine Metabolism               | N-acetylleucine                              | 0,0003 | 0,0006 | 0,4546 |
| Nucleotide             | Pyrimidine Metabolism, Uracil containing                | 3-ureidopropionate                           | 0,0003 | 0,0006 | 0,4536 |
| Energy                 | TCA Cycle                                               | malate                                       | 0,0003 | 0,0006 | 0,4532 |
| Xenobiotics            | Benzoate Metabolism                                     | 4-ethylphenylsulfate                         | 0,0003 | 0,0006 | 0,4518 |
| Xenobiotics            | Drug - Analgesics, Anesthetics                          | N-ethylglycinexylidide                       | 0,0003 | 0,0006 | 0,4515 |
| Lipid                  | Primary Bile Acid Metabolism                            | glycocholate glucuronide (1)                 | 0,0003 | 0,0007 | 0,4492 |
| Lipid                  | Fatty Acid Metabolism (also BCAA Metabolism)            | propionylcarnitine (C3)                      | 0,0003 | 0,0007 | 0,4479 |
| Lipid                  | Pregnenolone Steroids                                   | 21-hydroxypregnenolone monosulfate (1)       | 0,0004 | 0,0008 | 0,4456 |
| Lipid                  | Long Chain Polyunsaturated Fatty Acid (n3 and n6)       | arachidonate (20:4n6)                        | 0,0004 | 0,0008 | 0,4446 |
| Amino Acid             | Lysine Metabolism                                       | N2-acetyl,N6-methyllysine                    | 0,0004 | 0,0008 | 0,4434 |
| Amino Acid             | Urea cycle; Arginine and Proline Metabolism             | N2,N5-diacetylornithine                      | 0,0004 | 0,0008 | 0,4430 |
| Amino Acid             | Urea cycle; Arginine and Proline Metabolism             | N-acetylarginine                             | 0,0004 | 0,0008 | 0,4426 |
| Peptide                | Gamma-glutamyl Amino Acid                               | gamma-glutamylphenylalanine                  | 0,0004 | 0,0008 | 0,4424 |

|                                   |                                                       |                                                 |        |        |        |
|-----------------------------------|-------------------------------------------------------|-------------------------------------------------|--------|--------|--------|
| Amino Acid                        | Glutamate Metabolism                                  | beta-citrylglutamate                            | 0,0004 | 0,0008 | 0,4421 |
| Amino Acid                        | Tryptophan Metabolism                                 | 6-bromotryptophan                               | 0,0004 | 0,0008 | 0,4421 |
| Lipid                             | Fatty Acid, Dicarboxylate                             | 2-hydroxysebacate                               | 0,0004 | 0,0009 | 0,4392 |
| Peptide                           | Modified Peptides                                     | N,N-dimethyl-pro-pro                            | 0,0005 | 0,0009 | 0,4377 |
| Lipid                             | Pregnenolone Steroids                                 | 17alpha-hydroxypregnenolone 3-sulfate           | 0,0005 | 0,0009 | 0,4376 |
| Nucleotide                        | Pyrimidine Metabolism, Cytidine containing            | cytidine                                        | 0,0006 | 0,0012 | 0,4293 |
| Lipid                             | Pregnenolone Steroids                                 | 17alpha-hydroxypregnanolone glucuronide         | 0,0006 | 0,0012 | 0,4290 |
| Lipid                             | Fatty Acid, Dicarboxylate                             | glutarate (C5-DC)                               | 0,0006 | 0,0013 | 0,4281 |
| Lipid                             | Fatty Acid, Dicarboxylate                             | 2-hydroxyadipate                                | 0,0007 | 0,0013 | 0,4275 |
| Amino Acid                        | Alanine and Aspartate Metabolism                      | hydroxyasparagine**                             | 0,0007 | 0,0013 | 0,4271 |
| Amino Acid                        | Tyrosine Metabolism                                   | 5-hydroxymethyl-2-furoic acid                   | 0,0007 | 0,0013 | 0,4269 |
| Amino Acid                        | Leucine, Isoleucine and Valine Metabolism             | alpha-hydroxyisocaproate                        | 0,0007 | 0,0013 | 0,4261 |
| Amino Acid                        | Methionine, Cysteine, SAM and Taurine Metabolism      | cysteine                                        | 0,0007 | 0,0013 | 0,4260 |
| Lipid                             | Fatty Acid Metabolism (also BCAA Metabolism)          | butyrylcarnitine (C4)                           | 0,0007 | 0,0013 | 0,4259 |
| Lipid                             | Secondary Bile Acid Metabolism                        | tauroursodeoxycholate                           | 0,0007 | 0,0013 | 0,4257 |
| Lipid                             | Fatty Acid Metabolism (Acyl Carnitine, Hydroxy)       | 3-hydroxyoctanoylcarnitine (2)                  | 0,0007 | 0,0013 | 0,4249 |
| Peptide                           | Dipeptide                                             | valylleucine                                    | 0,0007 | 0,0014 | 0,4243 |
| Amino Acid                        | Histidine Metabolism                                  | histidine                                       | 0,0007 | 0,0014 | 0,4238 |
| Carbohydrate                      | Pentose Metabolism                                    | ribitol                                         | 0,0007 | 0,0014 | 0,4236 |
| Partially Characterized Molecules | Partially Characterized Molecules                     | bilirubin degradation product, C16H18N2O5 (3)** | 0,0008 | 0,0014 | 0,4230 |
| Lipid                             | Sphingolipid Synthesis                                | sphinganine                                     | 0,0008 | 0,0015 | 0,4214 |
| Energy                            | Oxidative Phosphorylation                             | phosphate                                       | 0,0009 | 0,0016 | 0,4187 |
| Xenobiotics                       | Benzoate Metabolism                                   | 4-vinylphenol sulfate                           | 0,0009 | 0,0016 | 0,4179 |
| Amino Acid                        | Urea cycle; Arginine and Proline Metabolism           | trans-4-hydroxyproline                          | 0,0009 | 0,0017 | 0,4173 |
| Partially Characterized Molecules | Partially Characterized Molecules                     | GlcNAc sulfate conjugate of C21H34O2 steroid**  | 0,0009 | 0,0017 | 0,4168 |
| Amino Acid                        | Leucine, Isoleucine and Valine Metabolism             | beta-hydroxyisovalerate                         | 0,0010 | 0,0018 | 0,4147 |
| Xenobiotics                       | Food Component/Plant                                  | (2,4 or 2,5)-dimethylphenol sulfate             | 0,0010 | 0,0018 | 0,4137 |
| Lipid                             | Fatty Acid Metabolism (Acyl Carnitine, Dicarboxylate) | octadecenedioylcarnitine (C18:1-DC)*            | 0,0011 | 0,0019 | 0,4120 |
| Cofactors and Vitamins            | Vitamin B6 Metabolism                                 | pyridoxate                                      | 0,0011 | 0,0019 | 0,4119 |

|              |                                                       |                                                    |        |        |        |
|--------------|-------------------------------------------------------|----------------------------------------------------|--------|--------|--------|
| Lipid        | Carnitine Metabolism                                  | carnitine                                          | 0,0011 | 0,0020 | 0,4100 |
| Amino Acid   | Glutathione Metabolism                                | cysteinylglycine                                   | 0,0012 | 0,0021 | 0,4093 |
| Lipid        | Fatty Acid Metabolism (Acyl Carnitine, Short Chain)   | acetylcarnitine (C2)                               | 0,0012 | 0,0021 | 0,4083 |
| Amino Acid   | Guanidino and Acetamido Metabolism                    | 4-guanidinobutanoate                               | 0,0012 | 0,0021 | 0,4076 |
| Xenobiotics  | Chemical                                              | 3-acetylphenol sulfate                             | 0,0013 | 0,0022 | 0,4067 |
| Lipid        | Fatty Acid Metabolism (Acyl Choline)                  | arachidonoylcholine                                | 0,0013 | 0,0022 | 0,4064 |
| Peptide      | Acetylated Peptides                                   | 4-hydroxyphenylacetylglutamine                     | 0,0013 | 0,0022 | 0,4056 |
| Peptide      | Gamma-glutamyl Amino Acid                             | gamma-glutamylthreonine                            | 0,0014 | 0,0024 | 0,4038 |
| Carbohydrate | Pentose Metabolism                                    | lyxonate                                           | 0,0014 | 0,0024 | 0,4035 |
| Lipid        | Fatty Acid Metabolism (Acyl Carnitine, Hydroxy)       | 3-hydroxyhexanoylcarnitine (1)                     | 0,0014 | 0,0024 | 0,4029 |
| Energy       | TCA Cycle                                             | fumarate                                           | 0,0014 | 0,0024 | 0,4025 |
| Lipid        | Fatty Acid Metabolism (Acyl Carnitine, Medium Chain)  | octanoylcarnitine (C8)                             | 0,0015 | 0,0025 | 0,4016 |
| Amino Acid   | Methionine, Cysteine, SAM and Taurine Metabolism      | cysteine sulfinic acid                             | 0,0015 | 0,0025 | 0,4014 |
| Xenobiotics  | Food Component/Plant                                  | 2,8-quinolinediol sulfate                          | 0,0015 | 0,0025 | 0,4011 |
| Amino Acid   | Lysine Metabolism                                     | N2-acetyl,N6,N6-dimethyllysine                     | 0,0015 | 0,0025 | 0,4009 |
| Amino Acid   | Lysine Metabolism                                     | N,N,N-trimethyl-5-aminovalerate                    | 0,0016 | 0,0026 | 0,3989 |
| Lipid        | Corticosteroids                                       | cortolone glucuronide (1)                          | 0,0016 | 0,0027 | 0,3984 |
| Energy       | TCA Cycle                                             | succinate                                          | 0,0017 | 0,0027 | 0,3975 |
| Amino Acid   | Alanine and Aspartate Metabolism                      | N-carbamoylalanine                                 | 0,0017 | 0,0028 | 0,3965 |
| Energy       | TCA Cycle                                             | alpha-ketoglutarate                                | 0,0017 | 0,0028 | 0,3959 |
| Lipid        | Androgenic Steroids                                   | androstenediol (3alpha, 17alpha) monosulfate (3)   | 0,0018 | 0,0028 | 0,3957 |
| Lipid        | Fatty Acid Metabolism (Acyl Carnitine, Dicarboxylate) | pimeloylcarnitine/3-methyladipoylcarnitine (C7-DC) | 0,0018 | 0,0028 | 0,3956 |
| Amino Acid   | Glutamate Metabolism                                  | alpha-ketoglutaramate*                             | 0,0018 | 0,0029 | 0,3952 |
| Lipid        | Fatty Acid Metabolism (Acyl Choline)                  | docosahexaenoylcholine                             | 0,0018 | 0,0029 | 0,3945 |
| Lipid        | Androgenic Steroids                                   | androsterone glucuronide                           | 0,0019 | 0,0030 | 0,3934 |
| Lipid        | Corticosteroids                                       | tetrahydrocortisone glucuronide (5)                | 0,0019 | 0,0030 | 0,3933 |
| Lipid        | Fatty Acid Metabolism (Acyl Choline)                  | dihomo-linolenoyl-choline                          | 0,0019 | 0,0030 | 0,3932 |
| Xenobiotics  | Food Component/Plant                                  | mannonate*                                         | 0,0020 | 0,0032 | 0,3907 |
| Amino Acid   | Methionine, Cysteine, SAM and Taurine                 | lanthionine                                        | 0,0021 | 0,0032 | 0,3903 |

|                                   |                                                       |                                                       |        |        |        |
|-----------------------------------|-------------------------------------------------------|-------------------------------------------------------|--------|--------|--------|
|                                   | Metabolism                                            |                                                       |        |        |        |
| Lipid                             | Phospholipid Metabolism                               | glycerophosphoserine*                                 | 0,0021 | 0,0033 | 0,3898 |
| Cofactors and Vitamins            | Ascorbate and Aldarate Metabolism                     | gulonate*                                             | 0,0021 | 0,0033 | 0,3895 |
| Lipid                             | Androgenic Steroids                                   | 5alpha-androstan-3alpha,17beta-diol disulfate         | 0,0022 | 0,0034 | 0,3883 |
| Amino Acid                        | Lysine Metabolism                                     | N-acetyl-cadaverine                                   | 0,0023 | 0,0035 | 0,3869 |
| Amino Acid                        | Phenylalanine Metabolism                              | 2-hydroxyphenylacetate                                | 0,0023 | 0,0035 | 0,3868 |
| Amino Acid                        | Urea cycle; Arginine and Proline Metabolism           | arginine                                              | 0,0023 | 0,0035 | 0,3868 |
| Lipid                             | Phosphatidylserine (PS)                               | 1-stearoyl-2-oleoyl-GPS (18:0/18:1)                   | 0,0024 | 0,0037 | 0,3842 |
| Lipid                             | Corticosteroids                                       | tetrahydrocortisol glucuronide                        | 0,0025 | 0,0038 | 0,3838 |
| Xenobiotics                       | Chemical                                              | O-sulfo-tyrosine                                      | 0,0025 | 0,0038 | 0,3832 |
| Partially Characterized Molecules | Partially Characterized Molecules                     | N-acetylglucosamine conjugate of C24H40O4 bile acid** | 0,0025 | 0,0039 | 0,3827 |
| Lipid                             | Fatty Acid Metabolism (also BCAA Metabolism)          | propionylglycine                                      | 0,0026 | 0,0039 | 0,3825 |
| Cofactors and Vitamins            | Pantothenate and CoA Metabolism                       | pantoate                                              | 0,0026 | 0,0039 | 0,3819 |
| Lipid                             | Fatty Acid Metabolism (Acyl Carnitine, Dicarboxylate) | octadecanedioylcarnitine (C18-DC)*                    | 0,0027 | 0,0041 | 0,3806 |
| Xenobiotics                       | Drug - Psychoactive                                   | THC carboxylic acid                                   | 0,0028 | 0,0042 | 0,3793 |
| Xenobiotics                       | Benzoate Metabolism                                   | methyl-4-hydroxybenzoate sulfate                      | 0,0028 | 0,0042 | 0,3792 |
| Amino Acid                        | Leucine, Isoleucine and Valine Metabolism             | ethylmalonate                                         | 0,0029 | 0,0043 | 0,3784 |
| Lipid                             | Secondary Bile Acid Metabolism                        | glycoursodeoxycholate                                 | 0,0029 | 0,0043 | 0,3779 |
| Nucleotide                        | Purine Metabolism, Guanine containing                 | guanosine                                             | 0,0031 | 0,0045 | 0,3761 |
| Xenobiotics                       | Drug - Psychoactive                                   | THC carboxylic acid glucuronide                       | 0,0031 | 0,0046 | 0,3756 |
| Xenobiotics                       | Food Component/Plant                                  | 2-aminophenol sulfate                                 | 0,0032 | 0,0046 | 0,3748 |
| Amino Acid                        | Glycine, Serine and Threonine Metabolism              | dimethylglycine                                       | 0,0032 | 0,0047 | 0,3745 |
| Lipid                             | Fatty Acid Metabolism (Acyl Choline)                  | stearoylcholine*                                      | 0,0033 | 0,0047 | 0,3738 |
| Lipid                             | Fatty Acid, Dicarboxylate                             | tetradecanedioate (C14-DC)                            | 0,0034 | 0,0050 | 0,3720 |
| Amino Acid                        | Histidine Metabolism                                  | hydantoin-5-propionate                                | 0,0036 | 0,0052 | 0,3697 |
| Lipid                             | Sphingosines                                          | sphingosine                                           | 0,0036 | 0,0052 | 0,3697 |
| Lipid                             | Androgenic Steroids                                   | androstenediol (3alpha, 17alpha) monosulfate (2)      | 0,0037 | 0,0053 | 0,3694 |
| Peptide                           | Gamma-glutamyl Amino Acid                             | gamma-glutamylmethionine                              | 0,0038 | 0,0055 | 0,3679 |
| Lipid                             | Fatty Acid Metabolism (Acyl Choline)                  | palmitoylcholine                                      | 0,0039 | 0,0056 | 0,3669 |

|                        |                                                              |                                        |        |        |        |
|------------------------|--------------------------------------------------------------|----------------------------------------|--------|--------|--------|
| Lipid                  | Endocannabinoid                                              | N-palmitoylserine                      | 0,0041 | 0,0058 | 0,3651 |
| Peptide                | Fibrinogen Cleavage Peptide                                  | fibrinopeptide A (2-15)**              | 0,0042 | 0,0059 | 0,3643 |
| Amino Acid             | Urea cycle; Arginine and Proline Metabolism                  | proline                                | 0,0042 | 0,0060 | 0,3641 |
| Peptide                | Fibrinogen Cleavage Peptide                                  | fibrinopeptide A (5-16)*               | 0,0043 | 0,0061 | 0,3633 |
| Lipid                  | Fatty Acid Metabolism (Acyl Carnitine, Dicarboxylate)        | suberoylcarnitine (C8-DC)              | 0,0044 | 0,0061 | 0,3631 |
| Peptide                | Gamma-glutamyl Amino Acid                                    | gamma-glutamylglutamate                | 0,0044 | 0,0061 | 0,3627 |
| Lipid                  | Eicosanoid                                                   | leukotriene B5                         | 0,0044 | 0,0061 | 0,3625 |
| Carbohydrate           | Pentose Metabolism                                           | arabonate/xylonate                     | 0,0045 | 0,0062 | 0,3623 |
| Amino Acid             | Leucine, Isoleucine and Valine Metabolism                    | methysuccinoylcarnitine                | 0,0047 | 0,0065 | 0,3602 |
| Xenobiotics            | Food Component/Plant                                         | tartronate (hydroxymalonate)           | 0,0047 | 0,0065 | 0,3598 |
| Amino Acid             | Lysine Metabolism                                            | pipecolate                             | 0,0054 | 0,0074 | 0,3546 |
| Xenobiotics            | Drug - Analgesics, Anesthetics                               | 2-hydroxyibuprofen                     | 0,0054 | 0,0074 | 0,3546 |
| Lipid                  | Androgenic Steroids                                          | 16alpha-hydroxy DHEA 3-sulfate         | 0,0056 | 0,0076 | 0,3536 |
| Carbohydrate           | Glycolysis, Gluconeogenesis, and Pyruvate Metabolism         | lactate                                | 0,0056 | 0,0076 | 0,3532 |
| Amino Acid             | Glutathione Metabolism                                       | 2-hydroxybutyrate/2-hydroxyisobutyrate | 0,0057 | 0,0077 | 0,3525 |
| Lipid                  | Fatty Acid Metabolism (Acyl Carnitine, Long Chain Saturated) | stearoylcarnitine (C18)                | 0,0058 | 0,0078 | 0,3519 |
| Lipid                  | Phospholipid Metabolism                                      | glycerophosphoethanolamine             | 0,0059 | 0,0079 | 0,3515 |
| Lipid                  | Corticosteroids                                              | cortisol 21-sulfate                    | 0,0061 | 0,0082 | 0,3501 |
| Lipid                  | Fatty Acid, Dihydroxy                                        | 9,10-DiHOME                            | 0,0063 | 0,0084 | 0,3490 |
| Xenobiotics            | Benzoate Metabolism                                          | 4-hydroxyhippurate                     | 0,0065 | 0,0086 | 0,3478 |
| Xenobiotics            | Benzoate Metabolism                                          | 3-ethylphenylsulfate                   | 0,0065 | 0,0086 | 0,3475 |
| Lipid                  | Secondary Bile Acid Metabolism                               | tauroolithocholate                     | 0,0067 | 0,0089 | 0,3463 |
| Peptide                | Gamma-glutamyl Amino Acid                                    | gamma-glutamyl-2-aminobutyrate         | 0,0068 | 0,0089 | 0,3460 |
| Peptide                | Gamma-glutamyl Amino Acid                                    | gamma-glutamyltyrosine                 | 0,0071 | 0,0093 | 0,3440 |
| Xenobiotics            | Drug - Analgesics, Anesthetics                               | carboxyibuprofen                       | 0,0071 | 0,0093 | 0,3439 |
| Cofactors and Vitamins | Tocopherol Metabolism                                        | alpha-tocopherol                       | 0,0071 | 0,0093 | 0,3438 |
| Amino Acid             | Phenylalanine Metabolism                                     | 4-hydroxyphenylacetate                 | 0,0072 | 0,0094 | 0,3435 |
| Lipid                  | Fatty Acid Metabolism (Acyl Glutamine)                       | hexanoylglutamine                      | 0,0072 | 0,0094 | 0,3434 |
| Amino Acid             | Phenylalanine Metabolism                                     | phenylalanine                          | 0,0073 | 0,0094 | 0,3431 |

|                        |                                                         |                                               |        |        |        |
|------------------------|---------------------------------------------------------|-----------------------------------------------|--------|--------|--------|
| Amino Acid             | Urea cycle; Arginine and Proline Metabolism             | dimethylarginine (SDMA + ADMA)                | 0,0073 | 0,0094 | 0,3428 |
| Xenobiotics            | Drug - Topical Agents                                   | 2,6-dihydroxybenzoic acid                     | 0,0074 | 0,0095 | 0,3426 |
| Lipid                  | Fatty Acid Metabolism (Acyl Choline)                    | linoleoylcholine*                             | 0,0074 | 0,0095 | 0,3422 |
| Nucleotide             | Purine Metabolism, (Hypo)Xanthine/Inosine containing    | urate                                         | 0,0075 | 0,0096 | 0,3417 |
| Amino Acid             | Tryptophan Metabolism                                   | 7-hydroxyindole sulfate                       | 0,0077 | 0,0098 | 0,3408 |
| Amino Acid             | Lysine Metabolism                                       | N,N-dimethyl-5-aminovalerate                  | 0,0080 | 0,0101 | 0,3391 |
| Amino Acid             | Urea cycle; Arginine and Proline Metabolism             | argininosuccinate                             | 0,0080 | 0,0101 | 0,3391 |
| Lipid                  | Secondary Bile Acid Metabolism                          | taurodeoxycholate                             | 0,0080 | 0,0101 | 0,3391 |
| Amino Acid             | Methionine, Cysteine, SAM and Taurine Metabolism        | alpha-ketobutyrate                            | 0,0086 | 0,0108 | 0,3363 |
| Cofactors and Vitamins | Tocopherol Metabolism                                   | alpha-CEHC                                    | 0,0087 | 0,0109 | 0,3359 |
| Lipid                  | Lysophospholipid                                        | 1-palmitoyl-GPG (16:0)*                       | 0,0089 | 0,0111 | 0,3349 |
| Amino Acid             | Methionine, Cysteine, SAM and Taurine Metabolism        | methionine                                    | 0,0090 | 0,0112 | 0,3344 |
| Lipid                  | Fatty Acid, Dicarboxylate                               | hexadecanedioate (C16-DC)                     | 0,0092 | 0,0113 | 0,3337 |
| Amino Acid             | Glutathione Metabolism                                  | cys-gly, oxidized                             | 0,0092 | 0,0113 | 0,3336 |
| Nucleotide             | Pyrimidine Metabolism, Cytidine containing              | 2'-O-methylcytidine                           | 0,0092 | 0,0113 | 0,3336 |
| Lipid                  | Fatty Acid Metabolism (Acyl Carnitine, Monounsaturated) | ximenoylcarnitine (C26:1)*                    | 0,0092 | 0,0113 | 0,3335 |
| Nucleotide             | Purine Metabolism, (Hypo)Xanthine/Inosine containing    | xanthosine                                    | 0,0094 | 0,0115 | 0,3326 |
| Xenobiotics            | Drug - Analgesics, Anesthetics                          | ibuprofen acyl glucuronide                    | 0,0094 | 0,0115 | 0,3326 |
| Lipid                  | Phosphatidylserine (PS)                                 | 1-stearoyl-2-arachidonoyl-GPS (18:0/20:4)     | 0,0095 | 0,0116 | 0,3322 |
| Xenobiotics            | Drug - Antibiotic                                       | meropenem                                     | 0,0096 | 0,0117 | 0,3317 |
| Carbohydrate           | Disaccharides and Oligosaccharides                      | sucrose                                       | 0,0098 | 0,0119 | 0,3308 |
| Lipid                  | Fatty Acid Metabolism (Acyl Choline)                    | eicosapentaenoylcholine                       | 0,0101 | 0,0122 | 0,3296 |
| Lipid                  | Androgenic Steroids                                     | etiocholanolone glucuronide                   | 0,0102 | 0,0123 | 0,3291 |
| Lipid                  | Sterol                                                  | 7alpha-hydroxy-3-oxo-4-cholestenoate (7-Hoca) | 0,0106 | 0,0127 | 0,3276 |
| Carbohydrate           | Glycogen Metabolism                                     | maltose                                       | 0,0107 | 0,0128 | 0,3272 |
| Amino Acid             | Alanine and Aspartate Metabolism                        | aspartate                                     | 0,0108 | 0,0128 | 0,3270 |
| Xenobiotics            | Benzoate Metabolism                                     | guaiacol sulfate                              | 0,0108 | 0,0128 | 0,3269 |
| Peptide                | Dipeptide                                               | isoleucylglycine                              | 0,0109 | 0,0128 | 0,3266 |

|                        |                                           |                                                    |        |        |        |
|------------------------|-------------------------------------------|----------------------------------------------------|--------|--------|--------|
| Lipid                  | Medium Chain Fatty Acid                   | pelargonate (9:0)                                  | 0,0109 | 0,0128 | 0,3266 |
| Lipid                  | Fatty Acid, Dicarboxylate                 | tridecenedioate (C13:1-DC)*                        | 0,0109 | 0,0129 | 0,3263 |
| Peptide                | Fibrinogen Cleavage Peptide               | fibrinopeptide A (3-15)**                          | 0,0111 | 0,0131 | 0,3256 |
| Xenobiotics            | Drug - Analgesics, Anesthetics            | lidocaine                                          | 0,0117 | 0,0137 | 0,3235 |
| Peptide                | Gamma-glutamyl Amino Acid                 | gamma-glutamylisoleucine*                          | 0,0119 | 0,0139 | 0,3226 |
| Cofactors and Vitamins | Tocopherol Metabolism                     | gamma-tocopherol/beta-tocopherol                   | 0,0121 | 0,0141 | 0,3219 |
| Amino Acid             | Leucine, Isoleucine and Valine Metabolism | N-acetylisoleucine                                 | 0,0122 | 0,0141 | 0,3217 |
| Peptide                | Gamma-glutamyl Amino Acid                 | gamma-glutamyl-alpha-lysine                        | 0,0122 | 0,0141 | 0,3217 |
| Lipid                  | Androgenic Steroids                       | andro steroid monosulfate C19H28O6S (1)*           | 0,0123 | 0,0141 | 0,3214 |
| Amino Acid             | Glutamate Metabolism                      | glutamate                                          | 0,0123 | 0,0142 | 0,3212 |
| Cofactors and Vitamins | Ascorbate and Aldarate Metabolism         | ascorbic acid 2-sulfate                            | 0,0126 | 0,0145 | 0,3202 |
| Peptide                | Fibrinogen Cleavage Peptide               | fibrinopeptide A (7-16)*                           | 0,0127 | 0,0145 | 0,3201 |
| Cofactors and Vitamins | Nicotinate and Nicotinamide Metabolism    | N1-methyl-4-pyridone-3-carboxamide                 | 0,0128 | 0,0146 | 0,3196 |
| Lipid                  | Androgenic Steroids                       | 5alpha-androstan-3alpha,17beta-diol 17-glucuronide | 0,0131 | 0,0149 | 0,3186 |
| Lipid                  | Endocannabinoid                           | N-stearoylserine*                                  | 0,0131 | 0,0149 | 0,3185 |
| Peptide                | Fibrinogen Cleavage Peptide               | fibrinopeptide B (1-13)**                          | 0,0139 | 0,0157 | 0,3161 |
| Lipid                  | Fatty Acid, Dicarboxylate                 | heptenedioate (C7:1-DC)*                           | 0,0143 | 0,0161 | 0,3147 |
| Lipid                  | Lysophospholipid                          | 1-linoleoyl-GPG (18:2)*                            | 0,0144 | 0,0161 | 0,3146 |
| Amino Acid             | Tryptophan Metabolism                     | N-acetyltryptophan                                 | 0,0148 | 0,0166 | 0,3131 |
| Carbohydrate           | Pentose Metabolism                        | arabinose                                          | 0,0154 | 0,0171 | 0,3116 |
| Lipid                  | Fatty Acid, Monohydroxy                   | 2-hydroxyoctanoate                                 | 0,0154 | 0,0171 | 0,3116 |
| Lipid                  | Short Chain Fatty Acid                    | butyrate/isobutyrate (4:0)                         | 0,0157 | 0,0175 | 0,3105 |
| Xenobiotics            | Benzoate Metabolism                       | 4-acetylphenol sulfate                             | 0,0160 | 0,0177 | 0,3099 |
| Peptide                | Fibrinogen Cleavage Peptide               | fibrinopeptide A (4-15)**                          | 0,0162 | 0,0179 | 0,3092 |
| Lipid                  | Medium Chain Fatty Acid                   | caproate (6:0)                                     | 0,0165 | 0,0182 | 0,3084 |
| Peptide                | Fibrinogen Cleavage Peptide               | fibrinopeptide A (8-16)**                          | 0,0168 | 0,0185 | 0,3076 |
| Xenobiotics            | Drug - Analgesics, Anesthetics            | ibuprofen                                          | 0,0169 | 0,0185 | 0,3074 |
| Lipid                  | Primary Bile Acid Metabolism              | glyco-beta-muricholate**                           | 0,0176 | 0,0192 | 0,3056 |
| Amino Acid             | Leucine, Isoleucine and Valine Metabolism | 2-hydroxy-3-methylvalerate                         | 0,0178 | 0,0194 | 0,3049 |

|                        |                                                      |                                         |        |        |        |
|------------------------|------------------------------------------------------|-----------------------------------------|--------|--------|--------|
| Amino Acid             | Tyrosine Metabolism                                  | homovanillate (HVA)                     | 0,0181 | 0,0196 | 0,3042 |
| Lipid                  | Long Chain Polyunsaturated Fatty Acid (n3 and n6)    | dihomo-linolenate (20:3n3 or n6)        | 0,0181 | 0,0196 | 0,3042 |
| Lipid                  | Fatty Acid, Monohydroxy                              | 5-hydroxyhexanoate                      | 0,0182 | 0,0196 | 0,3041 |
| Amino Acid             | Lysine Metabolism                                    | N6,N6-dimethyllysine                    | 0,0187 | 0,0201 | 0,3029 |
| Amino Acid             | Leucine, Isoleucine and Valine Metabolism            | 2-methylbutyrylcarnitine (C5)           | 0,0192 | 0,0206 | 0,3017 |
| Amino Acid             | Leucine, Isoleucine and Valine Metabolism            | leucine                                 | 0,0193 | 0,0207 | 0,3014 |
| Lipid                  | Corticosteroids                                      | cortisone                               | 0,0194 | 0,0207 | 0,3011 |
| Xenobiotics            | Chemical                                             | diglycerol                              | 0,0195 | 0,0208 | 0,3010 |
| Carbohydrate           | Glycolysis, Gluconeogenesis, and Pyruvate Metabolism | 1,5-anhydroglucitol (1,5-AG)            | 0,0195 | 0,0208 | 0,3008 |
| Nucleotide             | Purine Metabolism, (Hypo)Xanthine/Inosine containing | inosine                                 | 0,0196 | 0,0209 | 0,3005 |
| Amino Acid             | Glycine, Serine and Threonine Metabolism             | glycine                                 | 0,0199 | 0,0210 | 0,3000 |
| Amino Acid             | Leucine, Isoleucine and Valine Metabolism            | 3-methylglutaryl carnitine (2)          | 0,0202 | 0,0213 | 0,2992 |
| Xenobiotics            | Tobacco Metabolite                                   | 2-hydroxyfluorene sulfate               | 0,0207 | 0,0217 | 0,2982 |
| Xenobiotics            | Chemical                                             | benzoylcarnitine*                       | 0,0208 | 0,0219 | 0,2979 |
| Xenobiotics            | Drug - Analgesics, Anesthetics                       | 3-(N-acetyl-cystein-S-yl) acetaminophen | 0,0211 | 0,0221 | 0,2973 |
| Cofactors and Vitamins | Vitamin A Metabolism                                 | retinal                                 | 0,0212 | 0,0222 | 0,2969 |
| Peptide                | Dipeptide                                            | threonylphenylalanine                   | 0,0219 | 0,0228 | 0,2955 |
| Carbohydrate           | Pentose Metabolism                                   | ribonate                                | 0,0222 | 0,0230 | 0,2949 |
| Peptide                | Acetylated Peptides                                  | phenylacetyl glycine                    | 0,0224 | 0,0232 | 0,2945 |
| Carbohydrate           | Glycolysis, Gluconeogenesis, and Pyruvate Metabolism | pyruvate                                | 0,0224 | 0,0232 | 0,2944 |
| Amino Acid             | Leucine, Isoleucine and Valine Metabolism            | 3-hydroxy-2-ethylpropionate             | 0,0225 | 0,0232 | 0,2943 |
| Amino Acid             | Glutamate Metabolism                                 | S-1-pyrroline-5-carboxylate             | 0,0227 | 0,0234 | 0,2938 |
| Lipid                  | Eicosanoid                                           | 12-HHTrE                                | 0,0240 | 0,0246 | 0,2912 |
| Peptide                | Dipeptide                                            | leucylalanine                           | 0,0242 | 0,0247 | 0,2908 |
| Xenobiotics            | Chemical                                             | succinimide                             | 0,0242 | 0,0247 | 0,2908 |
| Nucleotide             | Pyrimidine Metabolism, Cytidine containing           | cytosine                                | 0,0245 | 0,0249 | 0,2902 |
| Cofactors and Vitamins | Vitamin A Metabolism                                 | carotene diol (2)                       | 0,0252 | 0,0256 | 0,2888 |
| Amino Acid             | Tryptophan Metabolism                                | tryptophan                              | 0,0254 | 0,0257 | 0,2885 |
| Amino Acid             | Tryptophan Metabolism                                | serotonin                               | 0,0255 | 0,0257 | 0,2884 |

|                                   |                                                         |                                                     |        |        |        |
|-----------------------------------|---------------------------------------------------------|-----------------------------------------------------|--------|--------|--------|
| Lipid                             | Medium Chain Fatty Acid                                 | cis-4-decenoate (10:1n6)*                           | 0,0263 | 0,0264 | 0,2869 |
| Lipid                             | Fatty Acid Metabolism (Acyl Carnitine, Monounsaturated) | myristoleoylcarnitine (C14:1)*                      | 0,0262 | 0,0264 | 0,2869 |
| Peptide                           | Acetylated Peptides                                     | phenylacetylglutamine                               | 0,0270 | 0,0271 | 0,2856 |
| Xenobiotics                       | Drug - Analgesics, Anesthetics                          | morphine-6-glucuronide                              | 0,0272 | 0,0273 | 0,2851 |
| Xenobiotics                       | Drug - Analgesics, Anesthetics                          | morphine                                            | 0,0277 | 0,0277 | 0,2842 |
| Nucleotide                        | Pyrimidine Metabolism, Uracil containing                | uridine                                             | 0,0278 | 0,0277 | 0,2841 |
| Partially Characterized Molecules | Partially Characterized Molecules                       | glycine conjugate of C10H12O2*                      | 0,0284 | 0,0282 | 0,2830 |
| Nucleotide                        | Purine Metabolism, Guanine containing                   | guanine                                             | 0,0290 | 0,0287 | 0,2821 |
| Xenobiotics                       | Drug - Analgesics, Anesthetics                          | morphine-3-glucuronide                              | 0,0292 | 0,0289 | 0,2817 |
| Lipid                             | Fatty Acid, Dicarboxylate                               | octadecadienedioate (C18:2-DC)*                     | 0,0297 | 0,0293 | 0,2809 |
| Lipid                             | Fatty Acid, Dicarboxylate                               | adipate (C6-DC)                                     | 0,0298 | 0,0293 | 0,2807 |
| Lipid                             | Lysophospholipid                                        | 1-arachidonoyl-GPA (20:4)                           | 0,0302 | 0,0296 | 0,2801 |
| Xenobiotics                       | Drug - Antibiotic                                       | clindamycin                                         | 0,0304 | 0,0297 | 0,2798 |
| Amino Acid                        | Urea cycle; Arginine and Proline Metabolism             | homocitrulline                                      | 0,0308 | 0,0300 | 0,2792 |
| Lipid                             | Androgenic Steroids                                     | androsterone sulfate                                | 0,0308 | 0,0300 | 0,2791 |
| Xenobiotics                       | Chemical                                                | methylnaphthyl sulfate (2)*                         | 0,0309 | 0,0300 | 0,2789 |
| Amino Acid                        | Leucine, Isoleucine and Valine Metabolism               | 3-hydroxyisobutyrate                                | 0,0316 | 0,0307 | 0,2778 |
| Partially Characterized Molecules | Partially Characterized Molecules                       | bilirubin degradation product, C16H18N2O5 (1)**     | 0,0317 | 0,0307 | 0,2777 |
| Lipid                             | Androgenic Steroids                                     | 5alpha-androstan-3alpha,17beta-diol monosulfate (1) | 0,0325 | 0,0313 | 0,2764 |
| Peptide                           | Gamma-glutamyl Amino Acid                               | gamma-glutamylglycine                               | 0,0326 | 0,0313 | 0,2763 |
| Lipid                             | Fatty Acid Synthesis                                    | malonate                                            | 0,0331 | 0,0318 | 0,2755 |
| Lipid                             | Fatty Acid, Monohydroxy                                 | 3-hydroxystearate                                   | 0,0340 | 0,0325 | 0,2743 |
| Xenobiotics                       | Chemical                                                | 2,4-di-tert-butylphenol                             | 0,0341 | 0,0325 | 0,2741 |
| Amino Acid                        | Methionine, Cysteine, SAM and Taurine Metabolism        | S-methylcysteine sulfoxide                          | 0,0356 | 0,0339 | 0,2719 |
| Lipid                             | Sphingolipid Synthesis                                  | sphingadienine                                      | 0,0356 | 0,0339 | 0,2718 |
| Lipid                             | Androgenic Steroids                                     | androstenediol (3beta,17beta) disulfate (1)         | 0,0360 | 0,0341 | 0,2714 |
| Lipid                             | Fatty Acid, Dicarboxylate                               | octadecenedioate (C18:1-DC)                         | 0,0362 | 0,0342 | 0,2711 |
| Xenobiotics                       | Drug - Antibiotic                                       | penicillin G                                        | 0,0365 | 0,0344 | 0,2706 |

|                        |                                                              |                                                  |        |        |        |
|------------------------|--------------------------------------------------------------|--------------------------------------------------|--------|--------|--------|
| Lipid                  | Androgenic Steroids                                          | 5alpha-androstan-3alpha,17alpha-diol monosulfate | 0,0366 | 0,0344 | 0,2705 |
| Xenobiotics            | Drug - Gastrointestinal                                      | pantoprazole                                     | 0,0367 | 0,0345 | 0,2703 |
| Carbohydrate           | Fructose, Mannose and Galactose Metabolism                   | fructose                                         | 0,0374 | 0,0350 | 0,2694 |
| Cofactors and Vitamins | Vitamin B6 Metabolism                                        | pyridoxal                                        | 0,0376 | 0,0352 | 0,2691 |
| Lipid                  | Glycerolipid Metabolism                                      | glycerol 3-phosphate                             | 0,0377 | 0,0352 | 0,2689 |
| Xenobiotics            | Chemical                                                     | perfluorohexanesulfonate (PFHxS)                 | 0,0378 | 0,0352 | 0,2688 |
| Xenobiotics            | Food Component/Plant                                         | eugenol sulfate                                  | 0,0382 | 0,0355 | 0,2682 |
| Nucleotide             | Purine Metabolism, (Hypo)Xanthine/Inosine containing         | allantoin                                        | 0,0383 | 0,0355 | 0,2681 |
| Cofactors and Vitamins | Ascorbate and Aldarate Metabolism                            | oxalate (ethanedioate)                           | 0,0395 | 0,0366 | 0,2665 |
| Xenobiotics            | Food Component/Plant                                         | dihydrocaffeate sulfate (2)                      | 0,0398 | 0,0367 | 0,2662 |
| Xenobiotics            | Food Component/Plant                                         | 2-piperidinone                                   | 0,0400 | 0,0367 | 0,2660 |
| Lipid                  | Sterol                                                       | 3beta,7alpha-dihydroxy-5-cholestenoate           | 0,0400 | 0,0367 | 0,2659 |
| Peptide                | Fibrinogen Cleavage Peptide                                  | fibrinopeptide A, des-ala(1)*                    | 0,0411 | 0,0377 | 0,2645 |
| Peptide                | Fibrinogen Cleavage Peptide                                  | fibrinopeptide B (1-9)**                         | 0,0413 | 0,0378 | 0,2643 |
| Lipid                  | Fatty Acid, Dicarboxylate                                    | sebacate (C10-DC)                                | 0,0423 | 0,0386 | 0,2631 |
| Lipid                  | Fatty Acid Metabolism (Acyl Carnitine, Polyunsaturated)      | linolenoylcarnitine (C18:3)*                     | 0,0433 | 0,0394 | 0,2618 |
| Lipid                  | Secondary Bile Acid Metabolism                               | lithocholate sulfate (1)                         | 0,0435 | 0,0395 | 0,2615 |
| Xenobiotics            | Xanthine Metabolism                                          | 1-methylurate                                    | 0,0437 | 0,0396 | 0,2614 |
| Cofactors and Vitamins | Vitamin A Metabolism                                         | retinol (vitamin A)                              | 0,0459 | 0,0415 | 0,2588 |
| Lipid                  | Fatty Acid Metabolism (Acyl Carnitine, Long Chain Saturated) | lignoceroylcarnitine (C24)*                      | 0,0466 | 0,0420 | 0,2580 |
| Amino Acid             | Tryptophan Metabolism                                        | N-formylanthranilic acid                         | 0,0472 | 0,0425 | 0,2573 |
| Lipid                  | Fatty Acid, Monohydroxy                                      | 2-hydroxystearate                                | 0,0474 | 0,0426 | 0,2570 |
| Xenobiotics            | Food Component/Plant                                         | Pyrraline                                        | 0,0478 | 0,0429 | 0,2566 |
| Peptide                | Dipeptide                                                    | Phenylalanylalanine                              | 0,0496 | 0,0444 | 0,2546 |

**Table S9.** Correlation between individual the 56 steroid hormone metabolites and the maximal total SOFA score. The table presents the classification and identity of the metabolite together with the corresponding p-value and correlation value from the correlation analysis and the percentage of Sepsis-3 and Sepsis-2 patients with detectable levels. A correlation coefficient of 0.4-0.5 is indicated by gery shadow, a valie of 0.5-0.6 by dark grey shadow and a value >0.06 by dark grey shadow and the value in bold. P-values between 0.05-0.01 are also marked with gery shadow and values below 0.01 with dark grey shadow (\* The metabolite identity not confirmed based on a standard).

| Biochemical Subpathway/Metabolite Name            | p-value | Correlation | % detectable |          |
|---------------------------------------------------|---------|-------------|--------------|----------|
|                                                   |         |             | Sepsis-3     | Sepsis-2 |
| Sterols (7 metabolites)                           |         |             |              |          |
| Cholesterol                                       | 0,5103  | 0,0867      | 100%         | 100%     |
| cholesterol sulfate                               | 0,2975  | 0,1367      | 100          | 100      |
| 7alpha-hydroxy-3-oxo-4-cholestenoate (7-Hoca)     | 0,0106  | 0,3276      | 100          | 100      |
| 3beta,7alpha-dihydroxy-5-cholestenoate            | 0,0400  | 0,2659      | 100          | 100      |
| 3beta-hydroxy-5-cholestenoate                     | 0,2116  | 0,1636      | 91           | 76       |
| 4-cholesten-3-one                                 | 0,6933  | 0,0520      | 37           | 28       |
| Campesterol                                       | 0,1793  | 0,1757      | 100          | 100      |
| Pregnenolone steroids (9 metabolites)             |         |             |              |          |
| pregnenolone sulfate                              | 0,0000  | 0,5643      | 66           | 60       |
| 17alpha-hydroxypregnenolone 3-sulfate             | 0,0005  | 0,4376      | 100          | 96       |
| 17alpha-hydroxypregnanolone glucuronide           | 0,0006  | 0,4290      | 69           | 56       |
| 21-hydroxypregnenolone monosulfate (1)            | 0,0004  | 0,4456      | 100          | 100      |
| 21-hydroxypregnenolone disulfate                  | 0,0000  | 0,6244      | 100          | 100      |
| pregnenediol sulfate (C21H34O5S)*                 | 0,0000  | 0,5592      | 100          | 100      |
| pregnenediol disulfate (C21H34O8S2)*              | 0,0000  | 0,6248      | 100          | 100      |
| pregnenetriol sulfate*                            | 0,0000  | 0,5409      | 100          | 100      |
| pregnenetriol disulfate*                          | 0,0000  | 0,5848      | 54           | 44       |
| Progestin steroids (7 metabolites)                |         |             |              |          |
| 5alpha-pregnan-3beta-ol,20-one sulfate            | 0,0000  | 0,6636      | 100          | 96       |
| 5alpha-pregnan-3beta,20beta-diol monosulfate (1)  | 0,0000  | 0,6905      | 97           | 96       |
| 5alpha-pregnan-3beta,20alpha-diol monosulfate (2) | 0,0000  | 0,5298      | 100          | 100      |
| 5alpha-pregnan-3beta,20alpha-diol disulfate       | 0,0001  | 0,4870      | 91           | 80       |
| 5alpha-pregnan-diol disulfate                     | 0,0000  | 0,6320      | 97           | 100      |
| pregnanediol-3-glucuronide                        | 0,0001  | 0,4839      | 80           | 52       |
| pregnanolone/allopregnanolone sulfate             | 0,0000  | 0,6579      | 71           | 64       |
| Corticosteroids (8 metabolites)                   |         |             |              |          |
| Corticosterone                                    | 0,2252  | 0,1589      | 100          | 100      |
| Cortisol                                          | 0,4517  | 0,0990      | 89           | 56       |
| cortisol 21-sulfate                               | 0,0061  | 0,3501      | 100          | 100      |
| tetrahydrocortisol glucuronide                    | 0,0025  | 0,3838      | 94           | 80       |
| tetrahydrocortisol sulfate (1)                    | 0,0001  | 0,4908      | 100          | 100      |
| Cortisone                                         | 0,0194  | 0,3011      | 100          | 92       |
| tetrahydrocortisone glucuronide (5)               | 0,0019  | 0,3933      | 100          | 100      |
| cortolone glucuronide (1)                         | 0,0016  | 0,3984      | 71           | 48       |

| <b>Androgenic steroids (25 metabolites)</b>                                     |        |         |     |     |
|---------------------------------------------------------------------------------|--------|---------|-----|-----|
| 11-ketoetiocholanolone glucuronide                                              | 0,8753 | 0,0207  | 100 | 100 |
| dehydroepiandrosterone sulfate (DHEA-S)                                         | 0,1720 | 0,1786  | 100 | 100 |
| 16alpha-hydroxy DHEA 3-sulfate                                                  | 0,0056 | 0,3536  | 97  | 96  |
| androsterone glucuronide                                                        | 0,0019 | 0,3934  | 100 | 100 |
| epiandrosterone sulfate                                                         | 0,2045 | 0,1662  | 100 | 100 |
| androsterone sulfate                                                            | 0,0308 | 0,2791  | 97  | 100 |
| etiocholanolone glucuronide                                                     | 0,0102 | 0,3291  | 91  | 92  |
| 11beta-hydroxyetiocholanolone glucuronide*                                      | 0,6600 | -0,0580 | 71  | 56  |
| 5alpha-androstan-3alpha,17alpha-diol monosulfate                                | 0,0366 | 0,2705  | 77  | 48  |
| 5alpha-androstan-3alpha,17alpha-diol disulfate                                  | 0,0000 | 0,5751  | 100 | 100 |
| androstenediol (3beta,17beta) monosulfate (1)                                   | 0,1363 | 0,1946  | 97  | 92  |
| androstenediol (3beta,17beta) monosulfate (2)                                   | 0,5335 | -0,0820 | 100 | 100 |
| androstenediol (3beta,17beta) disulfate (1)                                     | 0,0360 | 0,2714  | 100 | 100 |
| androstenediol (3beta,17beta) disulfate (2)                                     | 0,0000 | 0,5510  | 100 | 100 |
| androstenediol (3alpha, 17alpha) monosulfate (2)                                | 0,0037 | 0,3694  | 97  | 96  |
| androstenediol (3alpha, 17alpha) monosulfate (3)                                | 0,0018 | 0,3957  | 94  | 92  |
| 5alpha-androstan-3alpha,17beta-diol monosulfate (1)                             | 0,0325 | 0,2764  | 71  | 72  |
| 5alpha-androstan-3alpha,17beta-diol monosulfate (2)                             | 0,7326 | -0,0450 | 86  | 72  |
| 5alpha-androstan-3alpha,17beta-diol disulfate                                   | 0,0022 | 0,3883  | 40  | 36  |
| 5alpha-androstan-3alpha,17beta-diol 17-glucuronide                              | 0,0131 | 0,3186  | 86  | 80  |
| 5alpha-androstan-3beta,17beta-diol monosulfate (2)                              | 0,1891 | 0,1719  | 100 | 100 |
| 5alpha-androstan-3beta,17beta-diol disulfate                                    | 0,0600 | 0,2442  | 91  | 76  |
| 5alpha-androstan-3beta,17alpha-diol disulfate                                   | 0,0962 | 0,2167  | 94  | 88  |
| andro steroid monosulfate C <sub>19</sub> H <sub>28</sub> O <sub>6</sub> S (1)* | 0,0123 | 0,3214  | 97  | 100 |
| 11beta-hydroxyandrosterone glucuronide                                          | 0,0532 | 0,2508  | 83  | 52  |
| <b>Estrogenic steroids (1 metabolite)</b>                                       |        |         |     |     |
| estrone 3-sulfate                                                               | 0,0002 | 0,4625  | 100 | 100 |

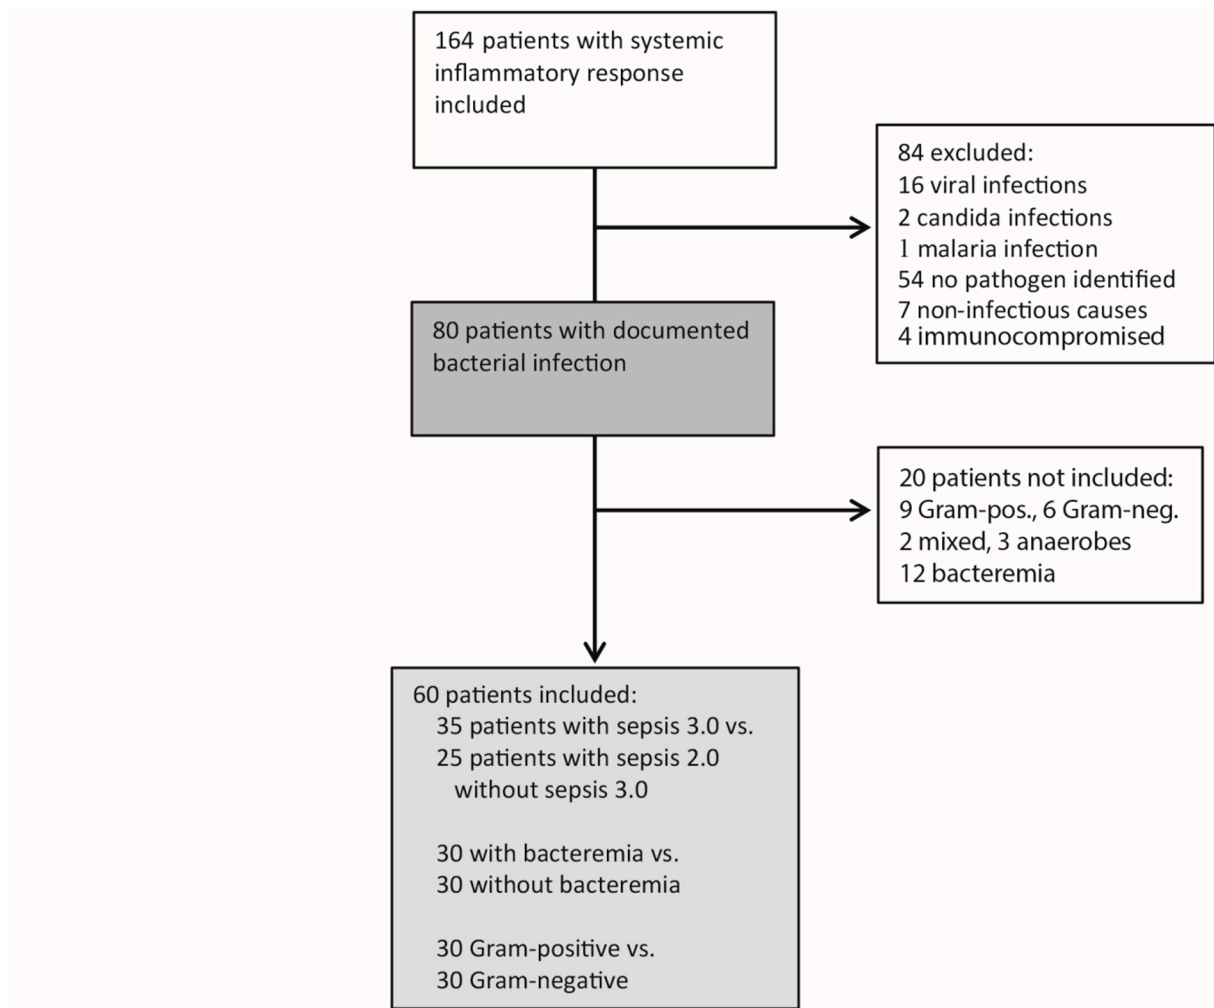

**Figure S1.** Selection of patients for the present study. Our study is based on a previous clinical study including 164 patients with a systemic inflammatory response; 84 patients were excluded (see upper right box) because they either were immunocompromized or had no documented bacterial infection. We then excluded 20 additional patients (lower right box) because they had mixed infections, infections with exceptional bacteria, or infection could not be documented by bacterial cutures (19 patients). One additional randomly selected patient with a Gram-negative infection was also excluded to have two groups with 30 patients each; our present study thereby included 60 patients. The 20 last excluded patients (see lower right box) included 12 patients with bacteremia, the main characteristics of the included patients are given in the lower grey box.

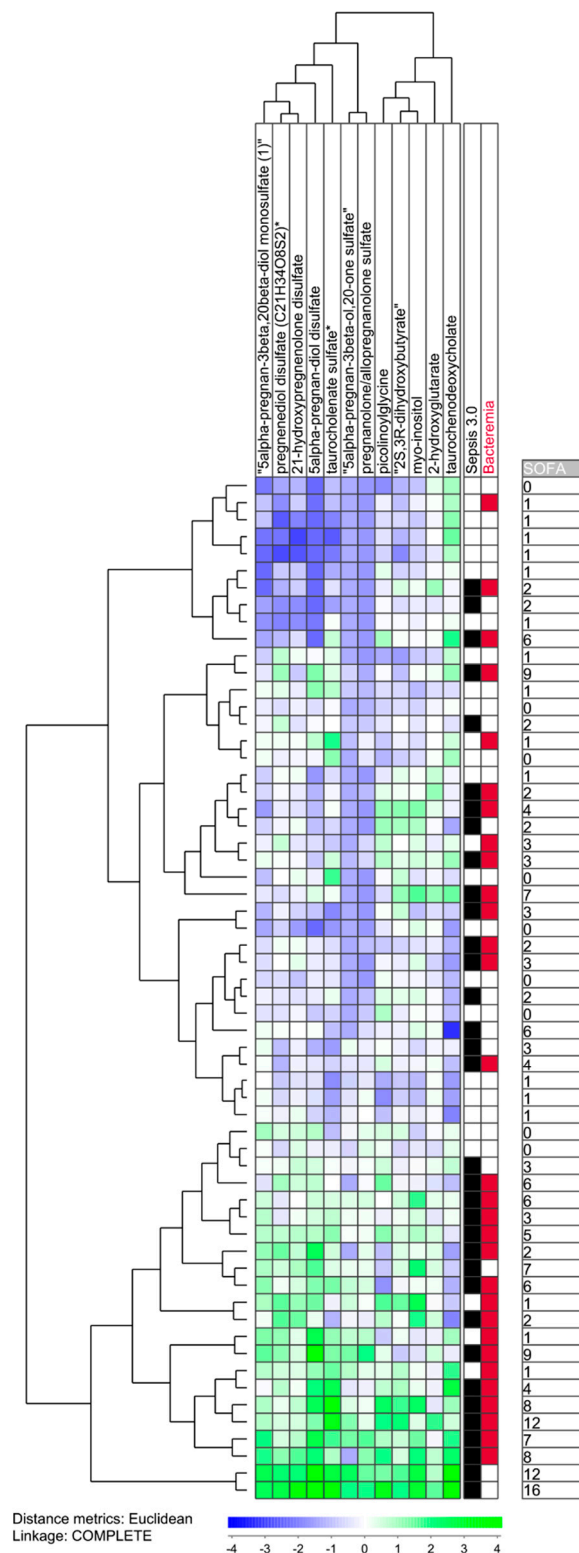

**Figure S2.** Subclassification of sepsis patients based on lipid metabolites that showed a strong correlation with the total SOFA score. The unsupervised hierarchical clustering analysis was based on 12 lipid metabolites showing a correlation with the Pearson's correlation test corresponding to a p-value <0.005 and a correlation factor >0.6. All metabolites showed detectable levels for at least 10 patients. The characteristics of each individual patient (fulfilling Sepsis-3 criteria, detection of bacteremia, total SOFA score) are indicated to the right in the figure.

## METHODOLOGICAL STRATEGIES USED BY METABOLON FOR ANALYSIS OF SERUM SAMPLES

### *The Metabolon platform*

**Sample Accessioning:** Following receipt, samples were inventoried and immediately stored at -80°C. Each sample received was accessioned into the Metabolon LIMS system and was assigned by the LIMS a unique identifier that was associated with the original source identifier only. This identifier was used to track all sample handling, tasks, results, etc. The samples (and all derived aliquots) were tracked by the LIMS system. All portions of any sample were automatically assigned their own unique identifiers by the LIMS when a new task was created; the relationship of these samples was also tracked. All samples were maintained at -80°C until processed.

**Sample Preparation:** Samples were prepared using the automated MicroLab STAR® system from Hamilton Company. Several recovery standards were added prior to the first step in the extraction process for QC purposes. To remove protein, dissociate small molecules bound to protein or trapped in the precipitated protein matrix, and to recover chemically diverse metabolites, proteins were precipitated with methanol under vigorous shaking for 2 min (Glen Mills GenoGrinder 2000) followed by centrifugation. The resulting extract was divided into five fractions: two for analysis by two separate reverse phase (RP)/UPLC-MS/MS methods with positive ion mode electrospray ionization (ESI), one for analysis by RP/UPLC-MS/MS with negative ion mode ESI, one for analysis by HILIC/UPLC-MS/MS with negative ion mode ESI, and one sample was reserved for backup. Samples were placed briefly on a TurboVap® (Zymark) to remove the organic solvent. The sample extracts were stored overnight under nitrogen before preparation for analysis.

**QA/QC:** Several types of controls were analyzed in concert with the experimental samples: a pooled matrix sample generated by taking a small volume of each experimental sample (or alternatively, use of a pool of well-characterized human plasma) served as a technical replicate throughout the data set; extracted water samples served as process blanks; and a cocktail of QC standards that were carefully chosen not to interfere with the measurement of endogenous compounds were spiked into every analyzed sample, allowed instrument performance monitoring and aided chromatographic alignment. Tables 1 and 2 describe these QC samples and standards. Instrument variability was determined by calculating the median relative standard deviation (RSD) for the standards that were added to each sample prior to injection into the mass spectrometers. Overall process variability was determined by calculating the median RSD for all endogenous metabolites (i.e., non-instrument standards) present in 100% of the pooled matrix samples. Experimental samples were randomized across the platform run with QC samples spaced evenly among the injections, as outlined in Figure 1.

**Table S10. Description of Metabolon QC Samples**

| Type  | Description                                                                                 | Purpose                                                                                                                            |
|-------|---------------------------------------------------------------------------------------------|------------------------------------------------------------------------------------------------------------------------------------|
| MTRX  | Large pool of human plasma maintained by Metabolon that has been characterized extensively. | Assure that all aspects of the Metabolon process are operating within specifications.                                              |
| CMTRX | Pool created by taking a small aliquot from every customer sample.                          | Assess the effect of a non-plasma matrix on the Metabolon process and distinguish biological variability from process variability. |
| PRCS  | Aliquot of ultra-pure water                                                                 | Process Blank used to assess the contribution to compound signals from the process.                                                |
| SOLV  | Aliquot of solvents used in extraction.                                                     | Solvent Blank used to segregate contamination sources in the extraction.                                                           |

**Table S11. Metabolon QC Standards**

| Type | Description       | Purpose                                                                      |
|------|-------------------|------------------------------------------------------------------------------|
| RS   | Recovery Standard | Assess variability and verify performance of extraction and instrumentation. |
| IS   | Internal Standard | Assess variability and performance of instrument.                            |

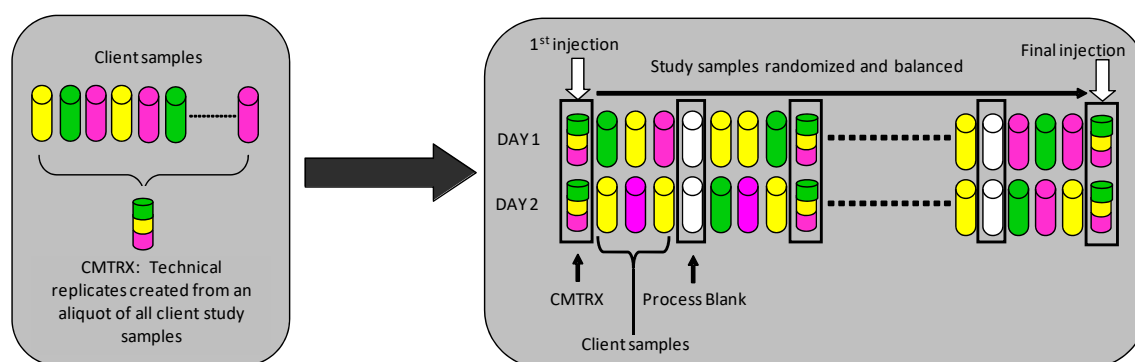

**Figure S3. Preparation of client-specific technical replicates.** A small aliquot of each client sample (colored cylinders) is pooled to create a CMTRX technical replicate sample (multi-colored cylinder), which is then injected periodically throughout the platform run. Variability among consistently detected biochemicals can be used to calculate an estimate of overall process and platform variability.

**Ultrahigh Performance Liquid Chromatography-Tandem Mass Spectroscopy (UPLC-MS/MS):** All methods utilized a Waters ACQUITY ultra-performance liquid chromatography (UPLC) and a Thermo Scientific Q-Exactive high resolution/accurate mass spectrometer interfaced with a heated electrospray ionization (HESI-II) source and Orbitrap mass analyzer operated at 35,000 mass resolution. The sample extract was dried then reconstituted in solvents compatible to each of the four methods. Each reconstitution solvent contained a series of standards at fixed concentrations to ensure injection and chromatographic consistency. One aliquot was analyzed using acidic positive ion conditions, chromatographically optimized for more hydrophilic compounds. In this method, the extract was gradient eluted from a C18 column (Waters UPLC BEH C18-2.1x100 mm, 1.7  $\mu$ m) using water and methanol, containing 0.05% perfluoropentanoic acid (PFPA) and 0.1% formic acid (FA). Another aliquot was also analyzed using acidic positive ion conditions, however it was chromatographically optimized for more hydrophobic compounds. In this method, the extract was gradient eluted from the same afore mentioned C18 column using methanol, acetonitrile, water, 0.05% PFPA and 0.01% FA and was operated at an overall higher organic content. Another aliquot was analyzed using basic negative ion optimized conditions using a separate dedicated C18 column. The basic extracts were gradient eluted from the column using methanol and water, however with 6.5mM Ammonium Bicarbonate at pH 8. The fourth aliquot was analyzed via negative ionization following elution from a HILIC column (Waters UPLC BEH Amide 2.1x150 mm, 1.7  $\mu$ m) using a gradient consisting of water and acetonitrile with 10mM Ammonium Formate, pH 10.8. The MS analysis alternated between MS and data-dependent MS<sup>n</sup> scans using dynamic exclusion. The scan range varied slightly between methods but covered 70-1000 m/z. Raw data files are archived and extracted as described below.

**Bioinformatics:** The informatics system consisted of four major components, the Laboratory Information Management System (LIMS), the data extraction and peak-identification software, data processing tools for QC and compound identification, and a collection of information interpretation and visualization tools for use by data analysts. The hardware and software foundations for these informatics components were the LAN backbone, and a database server running Oracle 10.2.0.1 Enterprise Edition.

**LIMS:** The purpose of the Metabolon LIMS system was to enable fully auditable laboratory automation through a secure, easy to use, and highly specialized system. The scope of the Metabolon LIMS system encompasses sample accessioning, sample preparation and instrumental analysis and reporting and advanced data analysis. All of the subsequent software systems are grounded in the LIMS data structures. It has been modified to leverage and interface with the in-house information extraction and data visualization systems, as well as third party instrumentation and data analysis software.

**Data Extraction and Compound Identification:** Raw data was extracted, peak-identified and QC processed using Metabolon's hardware and software. These systems are built on a web-service platform utilizing Microsoft's .NET technologies, which run on high-performance application servers and fiber-channel storage arrays in clusters to provide active failover and load-balancing. Compounds were identified by comparison to library entries of purified standards or recurrent unknown entities. Metabolon maintains a library based on authenticated standards that contains the retention time/index (RI), mass to charge ratio ( $m/z$ ), and chromatographic data (including MS/MS spectral data) on all molecules present in the library. Furthermore, biochemical identifications are based on three criteria: retention index within a narrow RI window of the proposed identification, accurate mass match to the library  $\pm 10$  ppm, and the MS/MS forward and reverse scores between the experimental data and authentic standards. The MS/MS scores are based on a comparison of the ions present in the experimental spectrum to the ions present in the library spectrum. While there may be similarities between these molecules based on one of these factors, the use of all three data points can be utilized to distinguish and differentiate biochemicals. More than 3300 commercially available purified standard compounds have been acquired and registered into LIMS for analysis on all platforms for determination of their analytical characteristics. Additional mass spectral entries have been created for structurally unnamed biochemicals, which have been identified by virtue of their recurrent nature (both chromatographic and mass spectral). These compounds have the potential to be identified by future acquisition of a matching purified standard or by classical structural analysis.

**Curation:** A variety of curation procedures were carried out to ensure that a high quality data set was made available for statistical analysis and data interpretation. The QC and curation processes were designed to ensure accurate and consistent identification of true chemical entities, and to remove those representing system artifacts, mis-assignments, and background noise. Metabolon data analysts use proprietary visualization and interpretation software to confirm the consistency of peak identification among the various samples. Library matches for each compound were checked for each sample and corrected if necessary.

**Metabolite Quantification and Data Normalization:** Peaks were quantified using area-under-the-curve. For studies spanning multiple days, a data normalization step was performed to correct variation resulting from instrument inter-day tuning differences. Essentially, each compound was corrected in run-day blocks by registering the medians to equal one (1.00) and normalizing each data point proportionately (termed the "block correction"; Figure 2). For studies that did not require more than one day of analysis, no normalization is necessary, other than for purposes of data visualization. In certain instances, biochemical data may have been normalized to an additional factor (e.g., cell counts, total protein as determined by Bradford assay, osmolality, etc.) to account for differences in metabolite levels due to differences in the amount of material present in each sample.

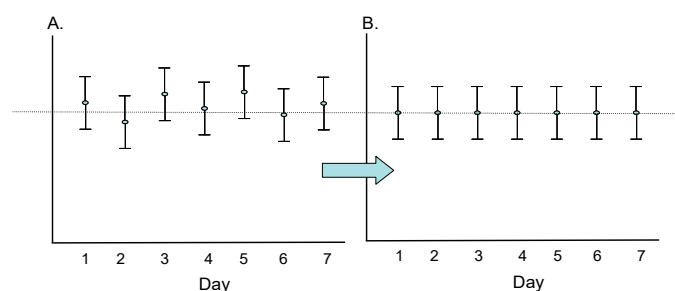

**Figure S4. Visualization of data normalization steps for a multiday platform run.**

## Statistical Methods and Terminology

**Statistical Calculations:** For many studies, two types of statistical analysis are usually performed: (1) significance tests and (2) classification analysis. Standard statistical analyses are performed in ArrayStudio/Jupyter Notebook on log transformed data. For those analyses not standard in ArrayStudio/Jupyter Notebook, the programs R (<http://cran.r-project.org/>) or JMP are used. Below are examples of frequently employed significance tests and classification methods followed by a discussion of p- and q-value significance thresholds.

### 1. One-way ANOVA

ANOVA stands for analysis of variance. For ANOVA, it is assumed that all populations have the same variances. One-way ANOVA is used to test whether at least two unknown means are all equal or whether at least one pair of means is different. For the case of two means, ANOVA gives the same result as a two-sided  $t$ -test with a pooled estimate of the variance.

An ANOVA uses an F-test which has two parameters – the numerator degrees of freedom and the denominator degrees of freedom. The degrees of freedom in the numerator are equal to  $g - 1$ , where  $g$  is the number of groups. If  $n$  is the total number of observations ( $n_1 + n_2$ ), then, the denominator degrees of freedom is equal to  $n - g$ . The F-statistic is the ratio of the between-groups variance to the within-groups variance, hence the higher the F-statistic the more evidence we have that the means are different.

Often within ANOVA, one performs linear contrasts for specific comparisons of interest. For example, suppose we have three groups A, B, C, then examples of some contrasts are A vs. B, the average of A and B vs. C, etc. For single-degree of freedom contrasts, these give the same result as a two-sided  $t$ -test with the pooled estimate of the variance from the ANOVA and degrees of freedom  $n - g$ . Below, we show the three formulas for A vs. B from a three group design as shown above. The numerator is same in each case, but the denominator differs by the estimates of the variances, and the degrees of freedom are different for each (if the theoretical assumptions hold, then the contrast has the most power, as it has the largest degrees of freedom).

Welch's two-sample  $t$ -test

$$\text{By } t = (\bar{x}_A - \bar{x}_B) / \sqrt{s_A^2/n_A + s_B^2/n_B}, \text{ and the degrees of freedom is given by } \left( \frac{s_A^2}{n_A} + \frac{s_B^2}{n_B} \right)^2 / \left( \frac{\left( \frac{s_A^2}{n_A} \right)^2}{n_A - 1} + \frac{\left( \frac{s_B^2}{n_B} \right)^2}{n_B - 1} \right)$$

Two-sample  $t$ -test with pooled estimate of variance from A and B

$$t = (\bar{x}_A - \bar{x}_B) / \sqrt{s_{AB}^2(1/n_A + 1/n_B)}$$

where  $s_{AB}^2 = ((n_A - 1)s_A^2 + (n_B - 1)s_B^2) / (n_A + n_B - 2)$ , where the degrees of freedom is  $n_A + n_B - 2$ . The contrast from the ANOVA,

$$t = (\bar{x}_A - \bar{x}_B) / \sqrt{s^2(1/n_A + 1/n_B)}$$

where  $s^2 = ((n_A - 1)s_A^2 + (n_B - 1)s_B^2 + (n_C - 1)s_C^2) / (n_A + n_B + n_C - 3)$ , where the degrees of freedom is given by where the degrees of freedom is  $n_A + n_B + n_C - 3$ .

### 2. Correlation

Correlation measures the strength and direction of a *linear* association between two variables. The statistical test for correlation tests whether the true correlation is zero or not.

The square of the correlation is the percentage of the total variation explained by a linear relationship between the two variables. Thus, with large sample sizes there may be a sample correlation of 0.1 that is statistically significant. This means we have high confidence that the true correlation is zero, however, only  $100 \times (0.1 \times 0.1)\% = 1\%$  of the variation of one variable is explained by a linear relationship with the other variable, so while there is an association, it has little predictive ability.

### 3. p-values

For statistical significance testing, p-values are given. The lower the p-value, the more evidence we have that the null hypothesis (typically that two population means are equal) is not true. If “statistical significance” is declared for p-values less than 0.05, then 5% of the time we incorrectly conclude the means are different, when actually they are the same.

The p-value is the probability that the test statistic is at least as extreme as observed in this experiment given that the null hypothesis is true. Hence, the more extreme the statistic, the lower the p-value and the more evidence the data gives against the null hypothesis.

### 4. q-values

The level of 0.05 is the false positive rate when there is one test. However, for a large number of tests we need to account for false positives. There are different methods to correct for multiple testing. The oldest methods are family-wise error rate adjustments (Bonferroni, Tukey, etc.), but these tend to be extremely conservative for a very large number of tests. With gene arrays, using the False Discovery Rate (FDR) is more common. The family-wise error rate adjustments give one a high degree of confidence that there are zero false discoveries. However, with FDR methods, one can allow for a small number of false discoveries. The FDR for a given set of compounds can be estimated using the q-value (see Storey J and Tibshirani R. (2003) Statistical significance for genomewide studies. Proc. Natl. Acad. Sci. USA 100: 9440-9445; PMID: [12883005](#)).

In order to interpret the q-value, the data must first be sorted by the p-value then choose the cutoff for significance (typically  $p < 0.05$ ). The q-value gives the false discovery rate for the selected list (i.e., an estimate of the proportion of false discoveries for the list of compounds whose p-value is below the cutoff for significance). For Table 3 below, if the whole list is declared significant, then the false discovery rate is approximately 10%. If everything from Compound 079 and above is declared significant, then the false discovery rate is approximately 2.5%.

| Compound     | p-value | q-value |
|--------------|---------|---------|
| Compound 103 | 0.0002  | 0.0122  |
| Compound 212 | 0.0004  | 0.0122  |
| Compound 076 | 0.0004  | 0.0122  |
| Compound 002 | 0.0005  | 0.0122  |
| Compound 168 | 0.0006  | 0.0122  |
| Compound 079 | 0.0016  | 0.0258  |
| Compound 113 | 0.0052  | 0.0631  |
| Compound 050 | 0.0053  | 0.0631  |
| Compound 098 | 0.0061  | 0.0647  |
| Compound 267 | 0.0098  | 0.0939  |

**Table S12. Example of q-value interpretation**
